# Supplementary material for: Genome skimming reveals a multipartite mitochondrial genome in the parasitic nematode Dioctophyme renale
Source: Research Square preprint supplement (doi:10.21203/rs.3.rs-8148715/v1), 2025-12-23

# Supplementary Figures

Figure S1\_ Example of D.renale mitochondrial assembly and mapped reads. Assembly smtDNA\_II was used as reference sequence. Alignment was obtained by minimap2 and visualization was made by IGV

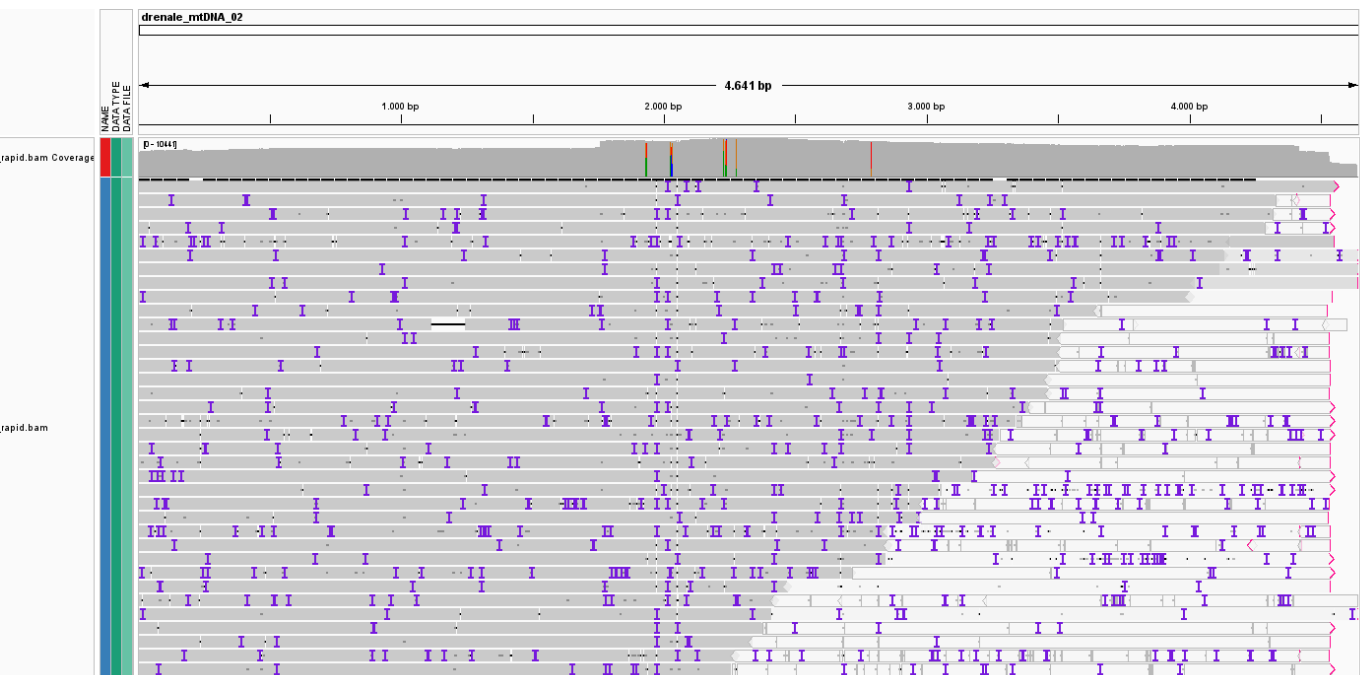

Figure S2. Distribution of read length by PCGs. Significance was evaluated by t-test (Rpackage)

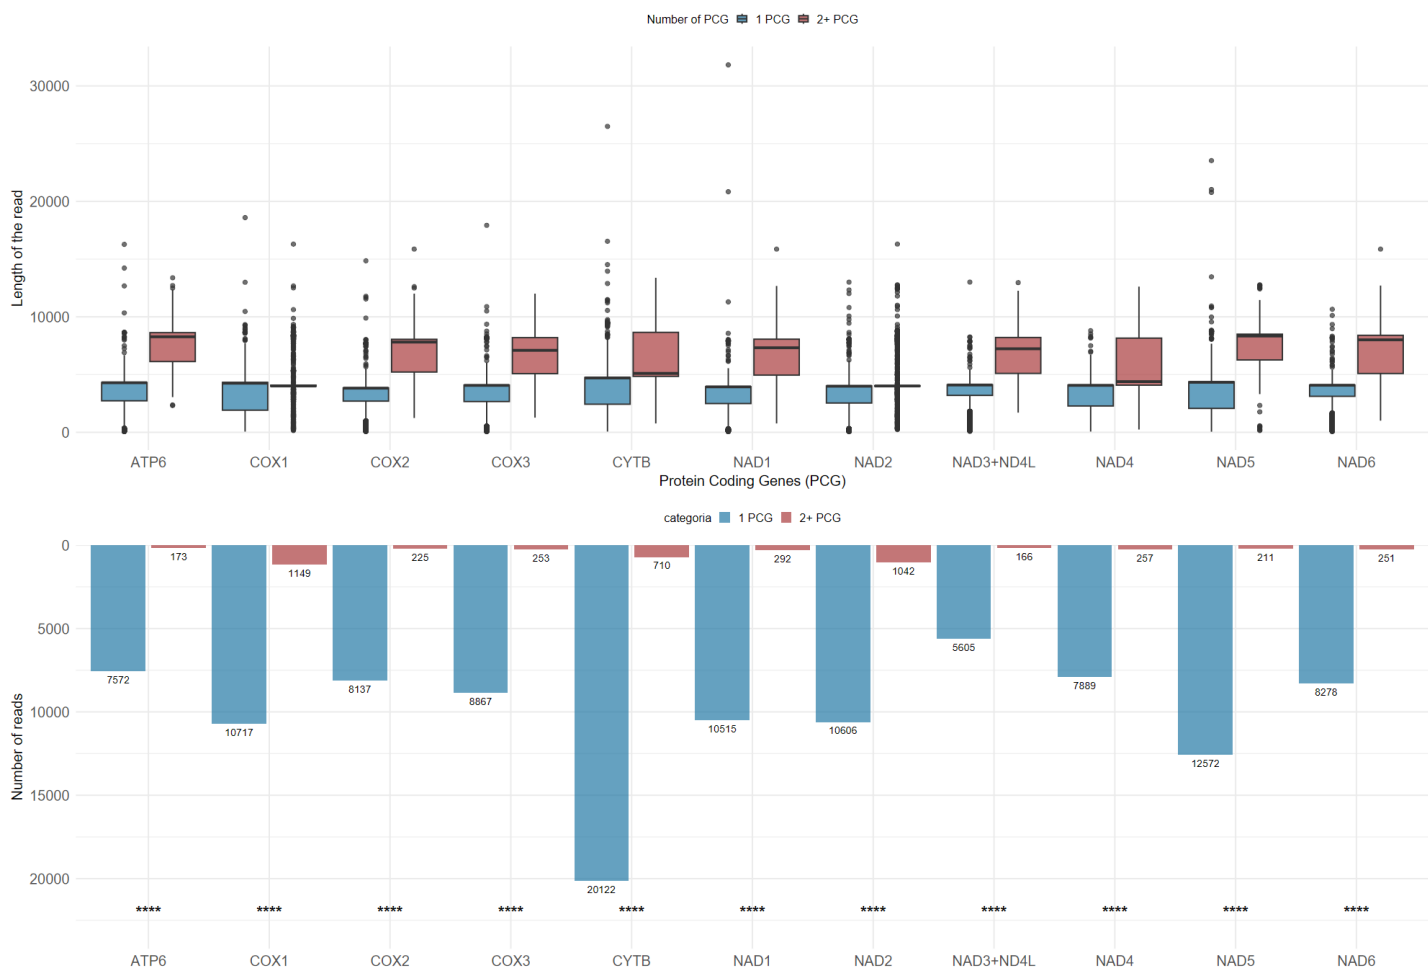

Figure S3. *D. renale* mitogenomes tRNA and rRNA genes structures. Folding structures were obtained by MitoS2. Duplicated genes are labeled as “1” and “2”

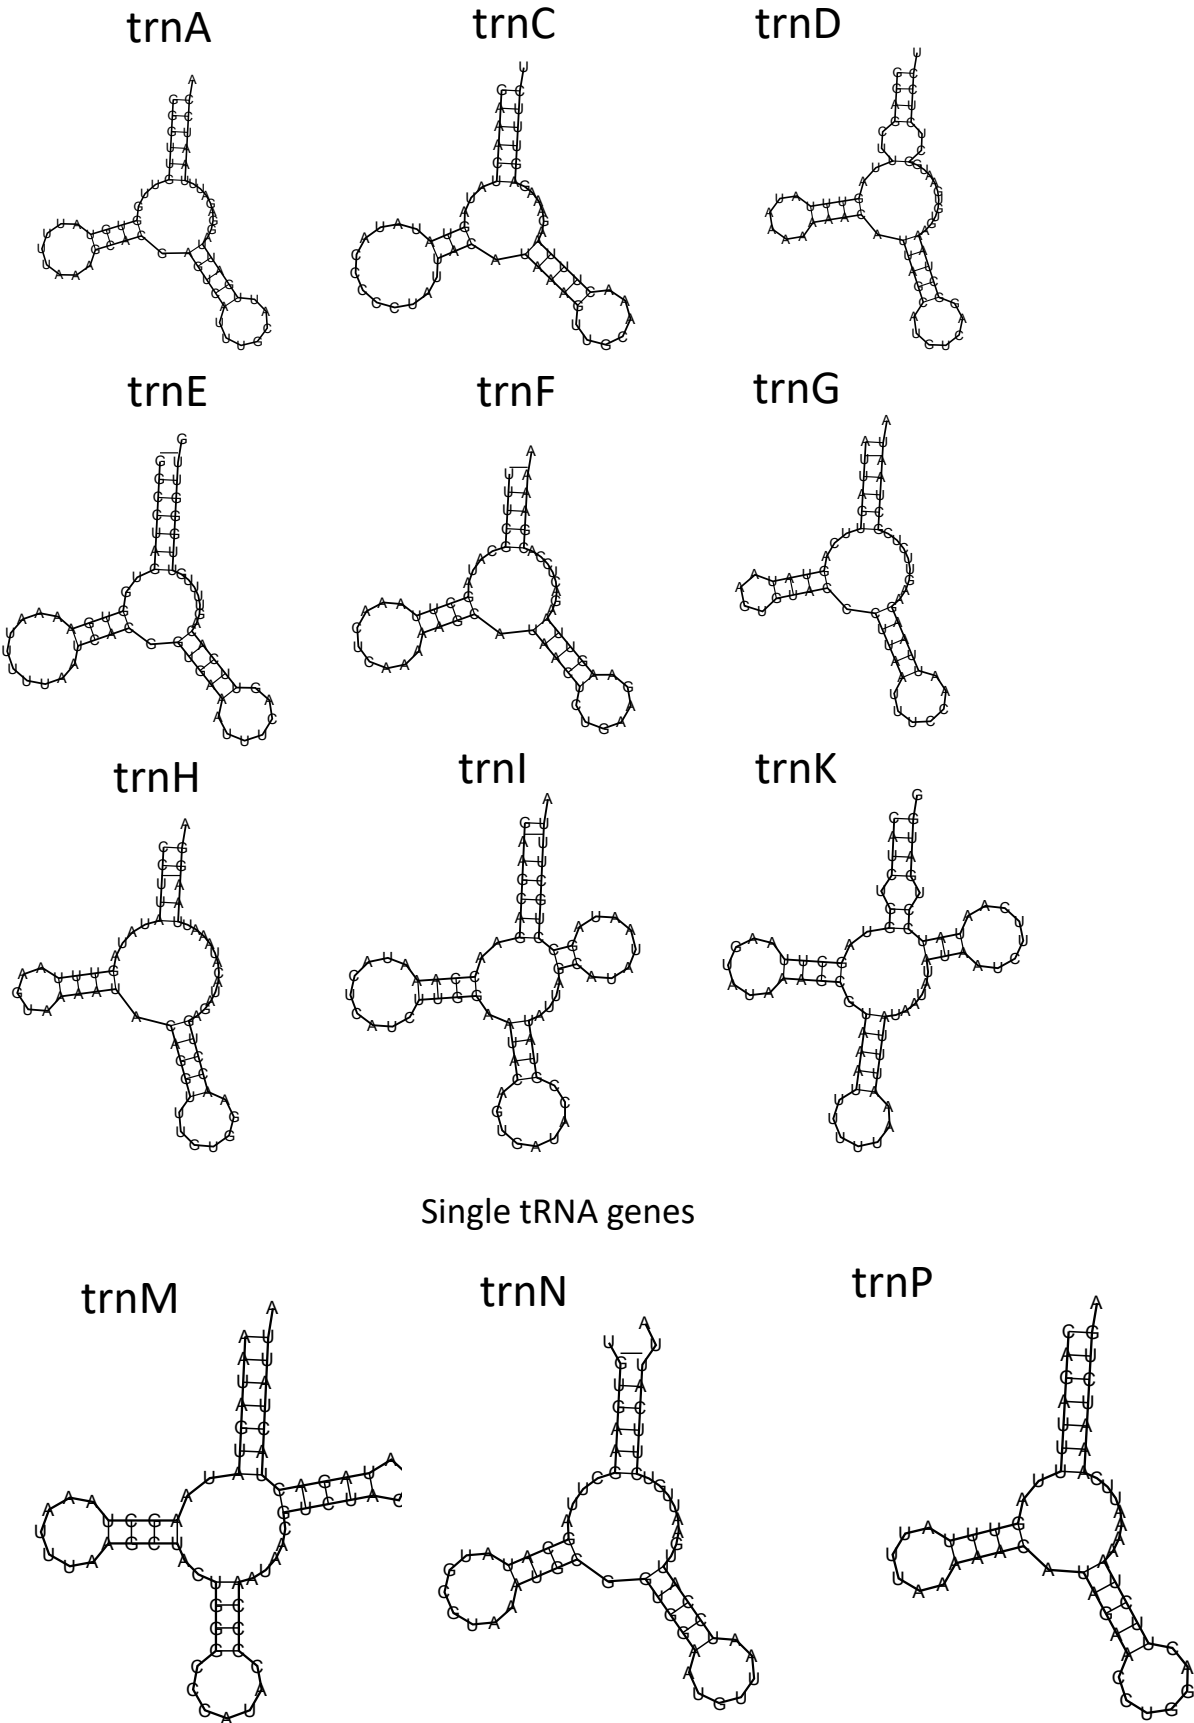

trnQ

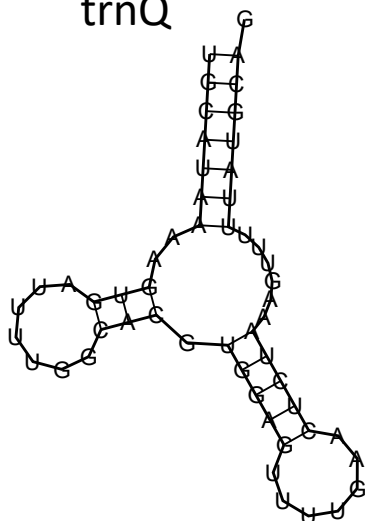

trnR

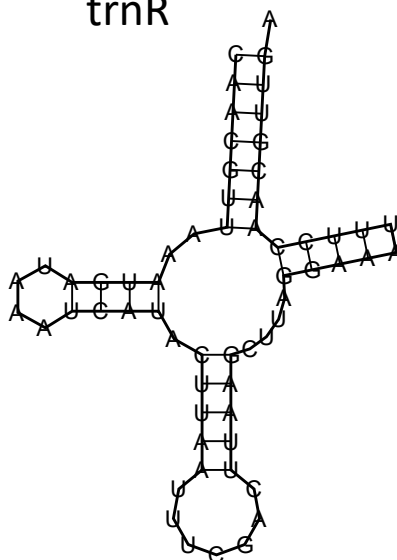

trnT

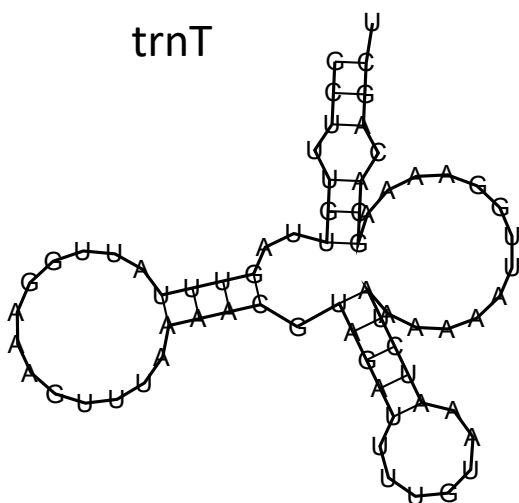

trnV

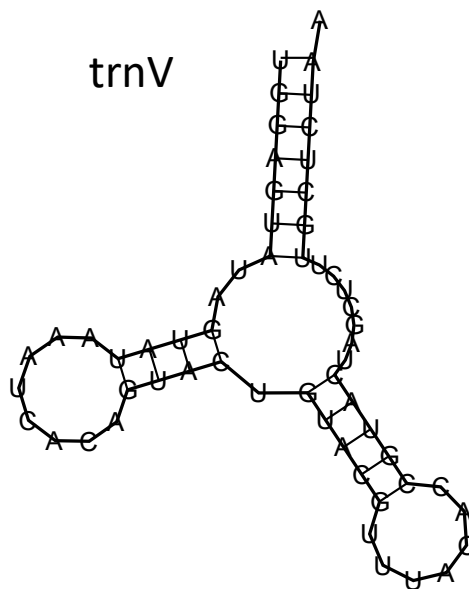

trnW

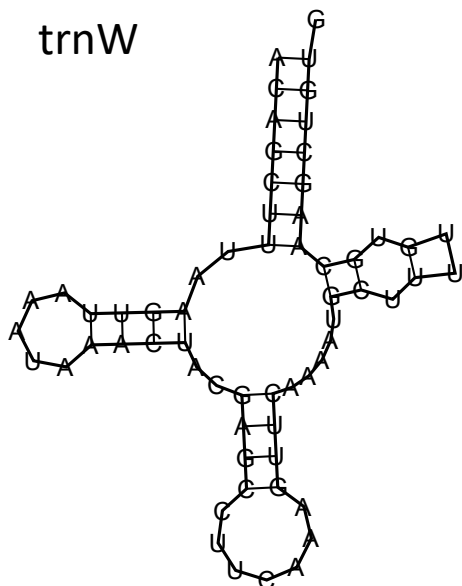

trnS1

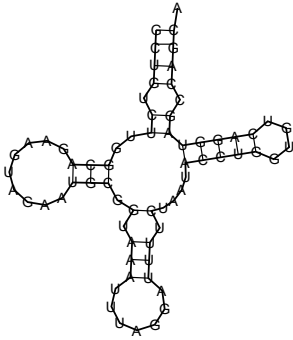

trnS2

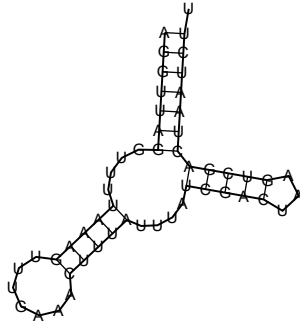

trnL1

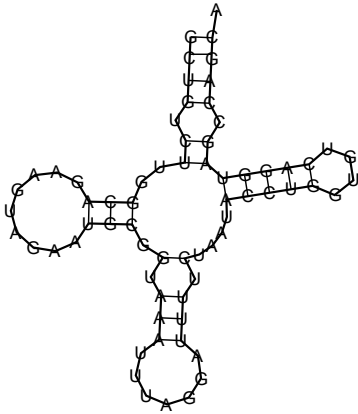

trnL2

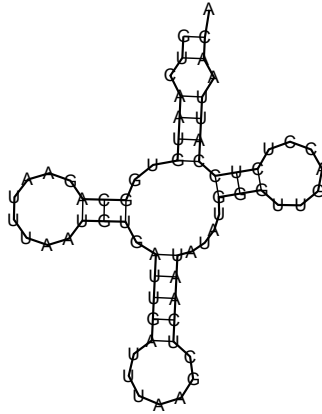

Duplicated tRNA genes

rrnL1

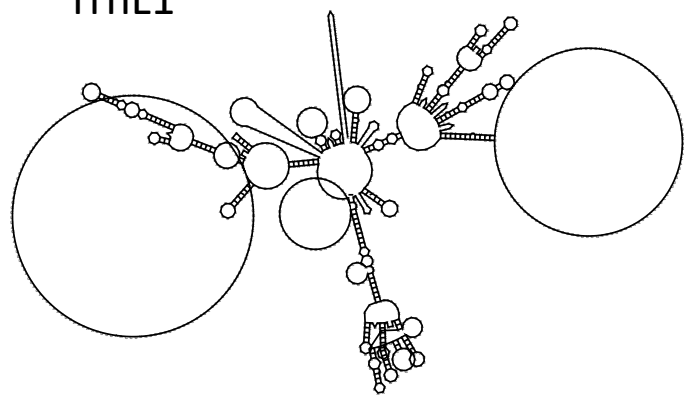

rrnL2

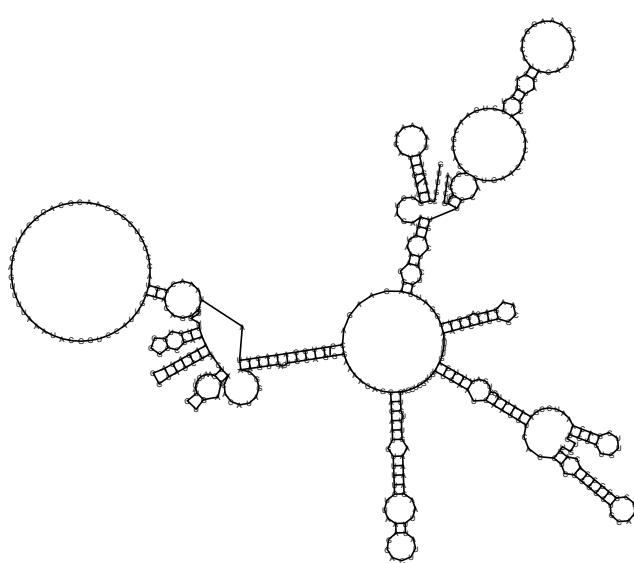

rrnS

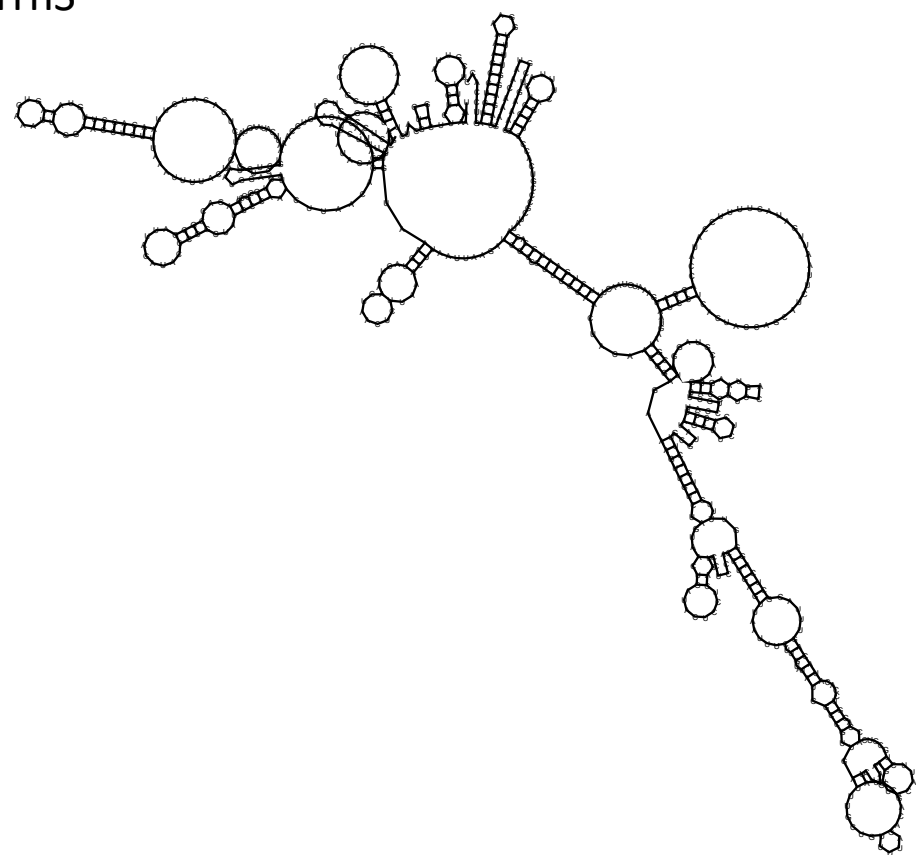

Supplement: Supplementary file 1 [file f8b69d95f96a628c9df35328.pdf]
