# Supplementary material for: Genome skimming reveals a multipartite mitochondrial genome in the parasitic nematode Dioctophyme renale
Source: Research Square preprint supplement (doi:10.21203/rs.3.rs-8148715/v1), 2025-12-23
Supplement: Supplementary file 1 [file fe6808a1b6d52805e6ba73c0.xlsx]

## Sheet: Reference_mitogenomes
Nematode Clade I and C. elegans Reference mitogenomes used in this work
Species	Genbank Accesion number	Link
Aonchotheca putorii mitochondrion	NC_071371	https://www.ncbi.nlm.nih.gov/nuccore/NC_071371
Eucoleus annulatus isolate Changsha mitochondrion	NC_056391	https://www.ncbi.nlm.nih.gov/nuccore/NC_056391
Romanomermis culicivorax	NC_008640	https://www.ncbi.nlm.nih.gov/nuccore/NC_008640
Romanomermis iyengari	NC_008693	https://www.ncbi.nlm.nih.gov/nuccore/NC_008693
Romanomermis nielseni	NC_008692	https://www.ncbi.nlm.nih.gov/nuccore/NC_008692
Trichinella britovi	NC_025750	https://www.ncbi.nlm.nih.gov/nuccore/NC_025750
Trichinella murrelli	NC_025751	https://www.ncbi.nlm.nih.gov/nuccore/NC_025751
Trichinella nativa isolate ISS10	NC_025752	https://www.ncbi.nlm.nih.gov/nuccore/NC_025752
Trichinella nelsoni isolate ISS37	NC_025753	https://www.ncbi.nlm.nih.gov/nuccore/NC_025753
Trichinella papuae isolate ISS1980	NC_025754	https://www.ncbi.nlm.nih.gov/nuccore/NC_025754
Trichinella pseudospiralis	NC_025749	https://www.ncbi.nlm.nih.gov/nuccore/NC_025749
Trichinella spiralis	NC_002681	https://www.ncbi.nlm.nih.gov/nuccore/NC_002681
Trichinella zimbabwensis isolate ISS1029	NC_025755	https://www.ncbi.nlm.nih.gov/nuccore/NC_025755
Trichuris discolor	NC_018596	https://www.ncbi.nlm.nih.gov/nuccore/NC_018596
Trichuris muris mitochondrial DNA	NC_028621	https://www.ncbi.nlm.nih.gov/nuccore/NC_028621
Trichuris ovis	NC_018597	https://www.ncbi.nlm.nih.gov/nuccore/NC_018597
Trichuris suis	NC_017747	https://www.ncbi.nlm.nih.gov/nuccore/NC_017747
Trichuris trichiura	NC_017750	https://www.ncbi.nlm.nih.gov/nuccore/NC_017750
Caenorhabditis elegans (outgroup)	NC_001328	https://www.ncbi.nlm.nih.gov/nuccore/NC_5834884

## Sheet: Number of PCG in each read
Read ID per PCG
Read ID	atp6	COX1	COX2	COX3	CYTB	NAD1	NAD2	NAD3	NAD4	NAD4l	NAD5	NAD6
003f84b5-cf2f-4c5c-89d5-8d26622d50a7		1					1
18566ac0-58be-43c6-870f-9d7d1db67447		1					1
23656845-cb3a-47d1-9f15-6808dd1a2dda		1					1
2475fe0d-6c07-449a-b627-79bc47e1ec81		1					1
35327f94-e961-4579-aa45-dd399b357c2c		1					1
3826d50d-211c-462a-a9d8-ccad573fb463		1					1
3848a4e2-cf3a-47c5-9a9d-d7e388948656		1					1
3bddf791-4d56-4259-8a7a-976eb3a7e4ea		1					1
3d113798-bdf2-46b9-b4a5-9807d62f7575		1					1
3d90695d-67ed-4b17-9be3-b7a4b31b5f4c		1					1
40831bf2-72c0-4751-b72d-e29a533df4c4		1					1
48be4805-cc2c-423b-872c-a60e41e1f8ed		1					1
578a4490-1a2c-44a1-a6e2-3441b90d46cc		1					1
5b05de6e-692e-48e4-b869-d06e2220fab9		1					1
60333cf7-f1c0-4622-81b0-ca700d948bb2		1					1
607bf47a-0052-43e9-9100-41b91bb4d769		1					1
612884e5-76bd-4fb4-a894-20fbbd2ae276		1					1
66a3a14a-32b9-4700-8153-5e6700d2e5b0		1					1
6c383241-d5b0-4a37-a00c-50e398d24328		1					1
6e044dbc-04fa-4bcd-96b3-c97ffb8bf56e		1					1
6e360b5a-a536-49d6-bbc8-e22689910010		1					1
8345caf8-0e31-498d-8950-bd60099eebe7		1					1
8358316c-893d-4155-b948-8e746f4b20d8		1					1
8579dfd7-bf2b-4908-bc80-ac596de9a6d7		1					1
86be2ee3-cb7b-4508-9c3f-e9739346fc4a		1					1
8a3c79db-0a03-4c1a-9f23-31eee0bcd75c		1					1
8be98619-07c1-45f9-92d1-97914842fbe2		1					1
8ed2db69-c437-476d-804a-f23348719b92		1					1
93a1d487-9057-43e9-a2e4-61875c8a050d		1					1
97b31b07-6e11-45ef-bfbd-f40b58887211		1					1
99448b61-917d-4189-ba26-3fb554adaa61		1					1
9b885cf8-cfbc-40fc-ab2b-384a26bd83e1		1					1
a315a9a3-d593-43f3-b1ed-7a1f3357bda5		1					1
a6ed99cd-cad2-4739-97b3-14c3b6d948d2		1					1
a7de2e46-ab95-4450-bd6f-31798bfb32bc		1					1
ac1a271c-1a1c-49b0-aad4-473afd2e2b52		1					1
acb29922-1274-4098-896d-c4034d1f8ab9		1					1
acf0ebd4-6014-4e42-81b9-c430ca481845		1		1			1
acf640b6-7506-4fda-8521-9ed6c13d97bc		1					1
add689ec-1a00-4059-bce5-906cc3d600e2		1					1
b7a38807-1fa1-4da1-8cca-eb164516f64f		1					1
bc54a357-3807-44f7-91f5-29cbc5cfea11		1					1
be1cb467-de7e-4215-9078-055a18c8c026		1					1
c208664c-1cda-4091-8006-c65b46e2dc7b		1					1
d06a85db-f516-4122-acdb-91d9918fd896		1					1
d21c8784-6c98-46ae-b874-f214d740b562		1					1
dab74dee-5b42-4335-b59d-b02de888246b		1					1
db5c044b-552b-4514-82dc-9dc26d388973		1					1
dd98a89b-2fc6-4cbc-94de-470084e8f8d6		1		1			1
df49527b-9285-4d83-b4e9-b1fcd167cec6		1					1
e2855022-e263-4474-9337-742f30a9dbae		1					1
e5fee021-bbe9-4fab-a983-0b1c61ae91a7		1					1
eeb56767-c00f-4589-8338-75dd8a05d1c7		1					1
eedbdaf0-bbf2-4dd4-abb3-7b8aab185dbe		1		1			1
f345dd04-8b5b-49ca-90ba-047d5b5e1a1c		1					1
f44ea575-0c65-4234-9759-22a04f365365		1					1
f8735046-06e4-43cb-9e3c-efe2f1fef278		1					1
fc05d610-06d7-4f12-a581-11d1b004ef04		1					1

## Sheet: smtDNA_reads
Number of reads aligned to each mitochondrial PCGs
PCG	reads number	sum_len (pb)	avg_len (pb)	GC(%)
ATP6	579	1979574	3419	44.04
COX1	945	2875252	3042.6	44.57
COX2	539	1625279	3015.4	45
COX3	689	2198862	3191.4	44.12
CYTB	1826	6178605	3383.7	44.28
NAD1	799	2401055	3005.1	44.83
NAD2	800	2564673	3205.8	44.55
NAD3	435	1451240	3336.2	42.99
NAD4	701	2053720	2929.7	43.76
NAD4L	409	1398276	3418.8	43.19
NAD5	1017	3064092	3012.9	44.33
NAD6	587	1915838	3263.8	44.14
Average	777.167	2.47554e+06	3185.37	44.15
Total	8917

## Sheet: Genes_by_smtDNA
Genes by mitogenome molecule in Dioctophyme renale
gene	smtDNA_I	smtDNA_II	smtDNA_III	smtDNA_IV	smtDNA_V	smtDNA_VI	smtDNA_VII	smtDNA_VIII	smtDNA_IX	smtDNA_X	smtDNA_XI	Number
atp6	TRUE	FALSE	FALSE	FALSE	FALSE	FALSE	FALSE	FALSE	FALSE	FALSE	FALSE	1
atp8	FALSE	FALSE	FALSE	FALSE	FALSE	FALSE	FALSE	FALSE	FALSE	FALSE	FALSE	0
cox1	FALSE	TRUE	FALSE	FALSE	FALSE	FALSE	FALSE	FALSE	FALSE	FALSE	FALSE	1
cox2	FALSE	FALSE	TRUE	FALSE	FALSE	FALSE	FALSE	FALSE	FALSE	FALSE	FALSE	1
cox3	FALSE	FALSE	FALSE	TRUE	FALSE	FALSE	FALSE	FALSE	FALSE	FALSE	FALSE	1
cytb	FALSE	FALSE	FALSE	FALSE	TRUE	FALSE	FALSE	FALSE	FALSE	FALSE	FALSE	1
nad1	FALSE	FALSE	FALSE	FALSE	FALSE	TRUE	FALSE	FALSE	FALSE	FALSE	FALSE	1
nad2	FALSE	FALSE	FALSE	FALSE	FALSE	FALSE	TRUE	FALSE	FALSE	FALSE	FALSE	1
nad3	FALSE	FALSE	FALSE	FALSE	FALSE	FALSE	FALSE	TRUE	FALSE	FALSE	FALSE	1
nad4l	FALSE	FALSE	FALSE	FALSE	FALSE	FALSE	FALSE	TRUE	FALSE	FALSE	FALSE	1
nad4	FALSE	FALSE	FALSE	FALSE	FALSE	FALSE	FALSE	FALSE	TRUE	FALSE	FALSE	1
nad5	FALSE	FALSE	FALSE	FALSE	FALSE	FALSE	FALSE	FALSE	FALSE	TRUE	FALSE	1
nad6	FALSE	FALSE	FALSE	FALSE	FALSE	FALSE	FALSE	FALSE	FALSE	FALSE	TRUE	1
rrnL	FALSE	FALSE	FALSE	TRUE	TRUE	FALSE	FALSE	FALSE	FALSE	FALSE	FALSE	2
rrnS	TRUE	FALSE	FALSE	FALSE	FALSE	FALSE	FALSE	FALSE	FALSE	FALSE	FALSE	1
trnA	FALSE	FALSE	TRUE	FALSE	FALSE	FALSE	FALSE	FALSE	FALSE	FALSE	FALSE	1
trnC	FALSE	FALSE	TRUE	FALSE	FALSE	FALSE	FALSE	FALSE	FALSE	FALSE	FALSE	1
trnD	FALSE	FALSE	FALSE	FALSE	FALSE	FALSE	FALSE	TRUE	FALSE	FALSE	FALSE	1
trnE	FALSE	FALSE	FALSE	FALSE	FALSE	FALSE	FALSE	FALSE	FALSE	FALSE	TRUE	1
trnF	FALSE	FALSE	FALSE	FALSE	FALSE	FALSE	TRUE	FALSE	FALSE	FALSE	FALSE	1
trnG	FALSE	FALSE	FALSE	FALSE	FALSE	TRUE	FALSE	FALSE	FALSE	FALSE	FALSE	1
trnH	FALSE	FALSE	FALSE	TRUE	FALSE	FALSE	FALSE	FALSE	FALSE	FALSE	FALSE	1
trnI	FALSE	FALSE	FALSE	FALSE	FALSE	FALSE	TRUE	FALSE	FALSE	FALSE	FALSE	1
trnK	FALSE	FALSE	FALSE	FALSE	FALSE	TRUE	FALSE	FALSE	FALSE	FALSE	FALSE	1
trnL1	FALSE	FALSE	FALSE	FALSE	FALSE	FALSE	FALSE	TRUE	FALSE	FALSE	FALSE	1
trnL2	FALSE	FALSE	TRUE	FALSE	FALSE	FALSE	FALSE	FALSE	FALSE	FALSE	FALSE	1
trnM	FALSE	FALSE	FALSE	FALSE	FALSE	FALSE	TRUE	FALSE	FALSE	FALSE	FALSE	1
trnN	FALSE	FALSE	FALSE	FALSE	FALSE	FALSE	FALSE	TRUE	FALSE	FALSE	FALSE	1
trnP	FALSE	FALSE	FALSE	FALSE	FALSE	FALSE	FALSE	FALSE	FALSE	FALSE	TRUE	1
trnQ	FALSE	FALSE	FALSE	TRUE	FALSE	FALSE	FALSE	FALSE	FALSE	FALSE	FALSE	1
trnR	FALSE	FALSE	FALSE	FALSE	FALSE	FALSE	FALSE	FALSE	TRUE	FALSE	FALSE	1
trnS1	TRUE	FALSE	FALSE	FALSE	FALSE	FALSE	FALSE	FALSE	FALSE	FALSE	TRUE	2
trnS2	FALSE	FALSE	FALSE	FALSE	FALSE	FALSE	FALSE	TRUE	FALSE	FALSE	FALSE	1
trnT	FALSE	FALSE	FALSE	FALSE	FALSE	FALSE	FALSE	TRUE	FALSE	FALSE	FALSE	1
trnV	FALSE	FALSE	FALSE	FALSE	FALSE	TRUE	FALSE	FALSE	FALSE	FALSE	FALSE	1
trnW	FALSE	FALSE	FALSE	FALSE	FALSE	FALSE	FALSE	TRUE	FALSE	FALSE	FALSE	1
trnY	FALSE	FALSE	FALSE	FALSE	FALSE	FALSE	FALSE	FALSE	FALSE	FALSE	TRUE	1
OL	TRUE	FALSE	FALSE	FALSE	FALSE	FALSE	FALSE	FALSE	FALSE	FALSE	TRUE	2
OH	TRUE	TRUE	TRUE	TRUE	TRUE	TRUE	TRUE	TRUE	TRUE	TRUE	TRUE	11
	3	1	4	4	2	4	4	8	2	1	5

## Sheet: smtDNA_annotation
Dioctohpyme renale Mitochondrial genome gene and non coding regions annotation
smtDNA ID	position (start-end)	strand	annotation
smtDNA_I	152-814	-	rrnS
smtDNA_I	892-944	-	trnS1(tct)
smtDNA_I	940-961	+	OL
smtDNA_I	1010-1750	-	atp6
smtDNA_I	2403-2439	+	OH_0-b
smtDNA_I	2741-2778	+	OH_0-a
smtDNA_I	3392-3424	+	OH_0-c
smtDNA_I	3545-3591	+	OH_1
smtDNA_I	1751-4328	+	NCR_1
smtDNA_II	139-1681	-	cox1
smtDNA_II	2337-2373	+	OH_0-b
smtDNA_II	2675-2712	+	OH_0-a
smtDNA_II	3326-3358	+	OH_0-c
smtDNA_II	3479-3525	+	OH_1
smtDNA_II	1682-3341	+	NCR_2
smtDNA_III	992-1038	+	OH_1
smtDNA_III	1159-1191	+	OH_0-c
smtDNA_III	1808-1841	+	OH_0-a
smtDNA_III	1852-1917	+	trnY(tat)
smtDNA_III	2143-2179	+	OH_0-b
smtDNA_III	2868-2925	+	trnA(tgc)
smtDNA_III	2925-2982	-	trnC(gca)
smtDNA_III	3084-3767	+	cox2
smtDNA_III	3769-3834	+	trnL2(taa)
smtDNA_III	16-2881	+	NCR3
smtDNA_IV	4-57	-	trnQ(ttg)
smtDNA_IV	104-877	-	cox3
smtDNA_IV	882-939	+	trnH(gtg)
smtDNA_IV	1605-1641	+	OH-b
smtDNA_IV	1943-1980	+	OH-a
smtDNA_IV	2594-2626	+	OH-c
smtDNA_IV	2763-2783	+	OH-d
smtDNA_IV	3671-4100	-	rrnL
smtDNA_IV	940-3669	+	NCR4
smtDNA_V	656-702	+	OH_1
smtDNA_V	823-855	+	OH_0-c
smtDNA_V	1469-1514	+	OH_0-a
smtDNA_V	1809-1845	+	OH_0-b
smtDNA_V	2207-3310	+	cob
smtDNA_V	3390-4522	+	rrnL
smtDNA_V	1-2205	+	NCR5
smtDNA_VI	11-64	-	trnG(tcc)
smtDNA_VI	73-130	-	trnV(tac)
smtDNA_VI	149-1060	-	nad1
smtDNA_VI	1049-1118	-	trnK(ttt)
smtDNA_VI	1776-1812	+	OH_0-b
smtDNA_VI	2107-2152	+	OH_0-a
smtDNA_VI	2766-2798	+	OH_0-c
smtDNA_VI	2919-2965	+	OH_1
smtDNA_VI	1119-3972	+	NCR6
smtDNA_VII	31-97	-	trnM(cat)
smtDNA_VII	96-153	-	trnF(gaa)
smtDNA_VII	159-226	-	trnI(gat)
smtDNA_VII	235-1089	-	nad2
smtDNA_VII	2269-2315	+	OH_1
smtDNA_VII	2436-2468	+	OH_0-c
smtDNA_VII	3082-3127	+	OH_0-a
smtDNA_VII	3422-3458	+	OH_0-b
smtDNA_VII	1090-4031	+	NCR7
smtDNA_VIII	266-333	+	trnL1(tag)
smtDNA_VIII	333-385	+	trnS2(tga)
smtDNA_VIII	386-737	+	nad3
smtDNA_VIII	723-791	+	trnT(tgt)
smtDNA_VIII	785-846	-	trnW(tca)
smtDNA_VIII	844-904	+	trnN(gtt)
smtDNA_VIII	920-1171	-	nad4l
smtDNA_VIII	1239-1297	+	trnD(gtc)
smtDNA_VIII	2305-2351	+	OH_1
smtDNA_VIII	2472-2504	+	OH_0-c
smtDNA_VIII	3118-3163	+	OH_0-a
smtDNA_VIII	3458-3494	+	OH_0-b
smtDNA_VIII	1298-4127	+	NCR8
smtDNA_IX	22-82	-	trnR(tcg)
smtDNA_IX	45-1304	-	nad4
smtDNA_IX	2347-2393	+	OH_1
smtDNA_IX	2514-2546	+	OH_0-c
smtDNA_IX	3160-3197	+	OH_0-a
smtDNA_IX	3499-3535	+	OH_0-b
smtDNA_IX	1305-4108	+	NCR9
smtDNA_X	24-1643	-	nad5
smtDNA_X	2640-2686	+	OH_1
smtDNA_X	2807-2839	+	OH_0-c
smtDNA_X	3453-3490	+	OH_0-a
smtDNA_X	3792-3828	+	OH_0-b
smtDNA_X	1644-4403	+	NCR10
smtDNA_XI	4-666	-	rrnS
smtDNA_XI	744-796	-	trnS1(tct)
smtDNA_XI	792-813	+	OL
smtDNA_XI	814-1266	-	nad6
smtDNA_XI	1268-1323	+	trnP(tgg)
smtDNA_XI	1326-1385	-	trnE(ttc)
smtDNA_XI	2030-2066	+	OH_0-b
smtDNA_XI	2361-2406	+	OH_0-a
smtDNA_XI	3020-3052	+	OH_0-c
smtDNA_XI	3173-3219	+	OH_1
smtDNA_XI	1386-3630	+	NCR11

## Sheet: smtDNA_PCG_nt
D. renale nucleotide sequences of mitochondrial genes in fasta format
>drenale_mtDNA_01; 152-814; -; rrnS
TAAAAATTTCGTTAAGGTCTTCAGCTGCATCTAGTAAAAGGTGTGCCAGCTACTGCGGTT
ATACACCTAGCCTCCGGTCTAAATCTGTTTCATTAAGCACAACTCCAAAATTCATAAGTA
CTCTCACATCTTAACAGCTTGTAAAGTGAAATTAGGAAGCTGTTTAAATTTTACTCACTC
TGCTCTAATGGAAATCTGGGGCTCAGACCGGGATTAGATACCCCGCTATGCCAAACTTAA
CAGGTAAAGTACTAAACTAACTCTTAAACTTAATTAAGATGGCGGTTCGGAACTACAACG
GAGAAAGTTGTCTAGTAACTGATACTCCTCACTCCTCCACCTGAGTTAATTTCTTGTATA
TCGCCGTTGATTTGCTGTTTTAGACAGCCTATCTGAAAGTTTCATTCTGCGTCACCAGGT
CCACATACAGTTTACGCTCAGGGTTTTGATGACTTGCGTATAGCTTCTCAGCTTACCTGC
TCACCTTCCAGTAAGTGAAACGTAGGATTCGTAAGTAATCCTCACTACCAGCATCTTAAT
TGATACTTTTCCATACCAGGATGAAATGTAACTTTCTGAATGCACATATCGCCCGTCACC
CTCCACTTTACTGGAGGAAAGTCGTAACAAAGTAGAGGTTTTGGAAAAAGCCTCTAGTCC
ACC
>drenale_mtDNA_01; 892-944; -; trnS1(tct)
GAAGAGGTTAAGGTTAAGCTTCTAACTTAACTTCTGACACTGTCACCTCTTCA
>drenale_mtDNA_01; 940-961; +; OL
TCTTCCCGTGAAAGAAGGAAGA
>drenale_mtDNA_01; 1010-1750; -; atp6
ATGATAAAATGATTATTGTGGTTGTTGGCGGGTAGGGTTATTGGTGTAACGTTGTTCAGT
GGAACTGGGGATTTGAGATATTTAAAGTACCGTGATTTAGGGGTAACTCTTGGAGCGATA
GATGTGGGTTATGGGGTCTGGGTGCAGGTTTTGTCATCTGTGGTGGTAACGGCCTTATTG
ATTTTTGTATTTTTAGGGCGGATGATGAGGGTGTCTCGTGGCAGGTTGTGAAAGGTTGGG
GTTGGGTTTGGTTCGAATATGGGTTACAGTGTGGTAATAACAGTGGTTACTGCGGTGGTT
TTGTTTAATTTAGTTTCAATATTTGCTTATTCGTGGATGCCGGCTACTCAATGGTATTTC
TTGTTTATTATGACATTTGTTTATTTGTTAGCTATGTTCTTATATGTCTTGTTGGCTTCT
GGTTTAAAAATGTTTGGGGTTAACGTGTATTTGGGGTGACTTCTCCTACATTTTATTCTA
TGGGGTTTTCACTCTGTTTCGTTTTTTGTTCGGTTTGTGTCATTGCCGTTTCGAATAATA
ATGAATTTAATGATTGGATTGTTTTTGTTGGAATTGGCCGAATCATCTGGCGTATCCGTA
TTGTTAATTTCTCTTTATGAGGTGTTTGTGATCAGGGTTCAAACGTTAGTCTTTGTGCTG
TTGGTTAACATGTACTACTCTGAGTCGGTTGTATCAGATACGTGACACGTTGAGCACCCT
CAGCAGGTTTCTCTTTTATAA
>drenale_mtDNA_01; 2403-2439; +; OH_0-b
AAAAAAAAATTCAAAAAAAAATACATAGATGAAAACA
>drenale_mtDNA_01; 2741-2778; +; OH_0-a
GGGGGGGGGTAAGGGGGGGGGGTTAGGGGGAGTGTGGG
>drenale_mtDNA_01; 3392-3424; +; OH_0-c
TATATATATATATTGATAGATATATAGGAGGAG
>drenale_mtDNA_01; 3545-3591; +; OH_1
ATATAAATAGGTTCCCTATATATATATCCATATATATCTTTTTTTTA
>drenale_mtDNA_02; 139-1681; -; cox1
ATGATAAAATGATTATTCACAGGAAATCATAAGAAAATTGGGGTAATATACATTTTGTTT
GGTGTGTGAGCAGGGTTTGTTGGGTTGGGGTTATCAGTTATTATTCGGTATGTGTTGGCA
TCACCGTGGTCTATAGGGTGAAGGCCTTTTATTAGGCAGTATTATAATGCTATTATTTCC
GCGCATGGCATTATTATAATCTTTTATATAATGATGCCTATTATAATAGGTGGGATGGGT
AATATTATAGTGCCTGTTATGTTGGGGCTTCCTGATATAGCTTTTCCACGTCTTAATAAT
TTGGGGTTTTGGTTATTGCCTCCTTCATTCTTATTGTTTGTAAGTTCCATAATGTTTTCG
GTTTCTGGCCCGGGCACAGGTTGGACCCTTTACCCTCCTCTATCTTTATTTACTGGGCAT
CCTGATGTTTGCGTGGATTTTGTGATCTTTTCTCTACATTTGGCGGGGGTGTCTTCTCTA
TTAAGAAGTGTAAATTTTGTAACGACGTGTTTTTCTGTTTGTGATTCGGTTTCTTCATTA
GAAGATATGCCAATGTTTGCGTGAAGCATTGTGGTGACGTCCTTCATACTAATTGTTTCT
CTTCCTGTTTTGGCAGGGGGTATCACAATACTTTTAACTGATCGGAATTTTAACACAGCT
TTTTTTGAAACTTCGGGAGGAGGTGACCCTGTTCTATTCCAACATATTTTCTGATTTTTT
GGCCATCCAGAGGTTTATATTTTAGCTTTGCCTGCTTTTGGTGTAATTTCAGAAAGGGTA
ACAGTTCTTAGTGGCAAGCCAAAGGTGTTTGGACCTTTGGGTATAATCTACGCTATAATT
AGAATTGGCGTGCTTGGTTGTTTTGTGTGGGTACATCACATGTTTACTGTAGGTTTAGAT
GTTGATACGCGTGCGTATTTTGCTGCTGCGAGTATAATCATCGGTATTCCGACGGGGGTA
AAAGTATTTAGTTGATTAGCTACTTTGTATGGTGGTCAGGTTATCTTTTCACCTTTGTAT
TGTTGGACTGTAGGGTTTATTTCTGTGTTTTTACTAGGAGGTTTAACAGGTATCTCGTTG
GCAAATGCGTCTTTAGATGTCCATTTGCACGACACTTATTATGTAGTAGGGCATTTCCAC
TTTGTTCTTAGTCTTGGGGTGGTGTTCGCTATTATAGTGGCTCTTAATCTATGGGCTCCT
TATATTTTTGGGGCTCAATTAGATAAATTTTTACAGCTGACTCAATTTATGGTTATGTTT
CCAGGGTCGTTTCTTACATTTCTTCCTCATCATTTTATGGGGTTAAACGGTATGCCTCGT
CGGTATGTGGATTATTCAGACTCTTATTCAGTTATACACCTTACCTCTTCTCTTGGAAGA
CTGTTATCAGCAATCTCTGTTGTGATATTATCGCTCACGCTGTGAGTCTTGCTCACCTCC
CCCCGCAACCTAATCAGGTTTACACCTTCCACCTCAAGCCCCACGGCTCTCCTCACCTCT
CCATTAACAGCGCACTCCTTCACCCAGCCTCACACTAACGGCT
>drenale_mtDNA_02; 2337-2373; +; OH_0-b
AAAAAAAAATTCAAAAAAAAATACATAGATGAAAACA
>drenale_mtDNA_02; 2675-2712; +; OH_0-a
GGGGGGGGGTAAGGGGGGGGGGTTAGGGGGAGTGTGGG
>drenale_mtDNA_02; 3326-3358; +; OH_0-c
TATATATATATATTGATAGATATATAGGAGGAG
>drenale_mtDNA_02; 3479-3525; +; OH_1
ATATAAATAGGTTCCCTATATATATATCCATATATATCTTTTTTTTA
>drenale_mtDNA_03; 992-1038; +; OH_1
TAAAAAAAAGATATATATGGATATATATATAGGGAACCTATTTATAT
>drenale_mtDNA_03; 1159-1191; +; OH_0-c
CTCCTCCTATATATCTATCAATATATATATATA
>drenale_mtDNA_03; 1808-1841; +; OH_0-a
ACACTCCCCCTAACCCCCCCCCTTACCCCCCCCC
>drenale_mtDNA_03; 1852-1917; +;trnY(tat)
GUCAAUGUGGCAGAAUUUAAUGUGAUUGAUUUCAAUAUAUGGGUUGACCUCUCCAUUAACA
>drenale_mtDNA_03; 2143-2179; +; OH_0-b
TGTTTTCATCTATGTATTTTTTTTTGAATTTTTTTTT
>drenale_mtDNA_03; 2868-2925; +; trnA(tgc)
GGGTTGTTGGTGTATTTTAAAGCACGAGTCATTTGCATTGATTAGGAGATTTAATCCA
>drenale_mtDNA_03; 2925-2982; -; trnC(gca)
GAAACTATAGTATATACCCCCTATTACATAAAGTTGCAAACTTTAAGAAAGAGTTTCT
>drenale_mtDNA_03; 3084-3767; +; cox2
ATGATAGAATGAGTGCGTTTTTTCTTGCAGGACCCCGCGTCTAATGATAGGTTGGGCGTG
TATGAGTTTATGTCATGGTTAATAGCGGTTTTGGCTCTTATTGTTGTTTTTAGTCTTGTG
TTGATTGTTTCTGTTCTTTTAAATAGCGGGGTTGGGTTTGTGTTGGGGTTGGTTGAATCC
AAACTCCTGGAGTTTTTATGAACGCTACTGCCGGTATTGATTGTGGTTTTAATTAGCGGG
TTTTCTTTACAACAAATTTACGCTTTAGACAGAGAGGAGGAGCCTCCTGTGCTTACGGTA
AAGGTGATTGCTCATCAATGGTATTGGAGGTACTCTTATCCTGATTTTTCGGTGGAGTTT
GATTCATATATAAATTCTGGCATTTCCTTAATGGAGCGACTTGTTGATTGTGATAATCGT
GTAGTGCTACCTGTGTTGACTCCTTCTCGATTTATTATTACATCTATAGATGTAATCCAC
TCTTGAGCGGTTCCTTCCTTTTCAGTAAAGGTGGATGCGGTCCCAGGTCGGGTGTCTTCT
GTTGTGCTTGAGTCAAAAGTGCCTGCTTTAGCAGTCGGGCAGTGTTCTGAGTTGTGTGGG
GTGAATCATAGTTTTATGCCAATTACTTTAGAGTTTACTTCTCCGCTTTTATTTAAGTGT
TGACTTACTTCTACCCTTAATTAG
>drenale_mtDNA_03; 3769-3834; +; trnL2(taa)
GTCAATGTGGCAGAATTTAATGTGATTGATTTAAGCTCAATATATGGGTTGACCTCTCCA
TTAACA
>drenale_mtDNA_04; 4-57; -; trnQ(ttg)
TGCATAAAAGTGATTTTGGCACGTGGAGTTTTGAACTCTAAAGTTTTTATGCAG
>drenale_mtDNA_04; 104-877; -; cox3
ATGATTAAATTTAGCTACAGGTTTTCAACCCCTTGGGTTTCGACATCGTTAGTGGCAACT
TTACTTTGTATGGTGGTGTTGTTAAGTTTATTTTGGACTAGGTGTGGTTTTGGTGTGCTG
TTAGTTAGGGGGGTGGTTCTACTAGTTTTAAGTGTTTTGTTGTGGCAGCGGGACCAGCAG
CGTGAGGGACTGGTCTCAATTCCTTCTTTGTCTGCCGATGATTATGATTTTAAAATGGGG
TTCTTGCTATTTCTTCTTGGGGAAGCTTTCTTCTTTTTGTCGTTTTTTTGGGTTTATGTG
TCTTCTGTACTAGTTCCGGACTATATAATATGGCCTCCAAAAGGTATTCTAGTGCCAGAT
TCCACCTCCTTGCCTTTGTTAAATACGGTGCTACTGGTAACGTCTAGATTAACTCTTACC
TTATCACACGAGTCTATTAATAGGCCATCTCCCGGGACGACTGGCTTTGTGTGGTTGTTT
TTAACTTTAGTTTTAGGGTTGATATTTTTAAGTTTTCAAGGTTGGGAGTATTTTAACCTT
CCCTTTTCACTAACTTCTGGGCTGTACGGGTCTGTGTTCTATGGGGCTACAGGATTTCAT
GGTCTTCATGTGTTCCTGGGAAGGTTGTTTCTGTTCTATTGTGCGGTTCGTCTAGTATTT
AACCACTACGATAGCGTGTTTCAACTGTCTTACACTCTGTCAGTATGGTATTGGCATTTT
GTGGATGCGATCTGACTGCTGCTGTTTATAATGATTTACTGTTGGGGTTGTTAA
>drenale_mtDNA_04; 882-939; +; trnH(gtg)
CCTTATATAGTTTAAGTAAAATACAGGTTTGTGGAACCTGAGATACATAAATTAAGGA
>drenale_mtDNA_04; 1605-1641; +; OH-b
AAAAAAAAATTCAAAAAAAAATACATAGATGAAAACA
>drenale_mtDNA_04; 1943-1980; +; OH-a
GGGGGGGGGTAAGGGGGGGGGGTTAGGGGGAGTGTGGG
>drenale_mtDNA_04; 2594-2626; +; OH-c
TATATATATATATTGATAGATATATAGGAGGAG
>drenale_mtDNA_04; 2763-2783; +; OH-d
TATATATATATCCATATATAT
>drenale_mtDNA_04; 3671-4100; -; rrnL
GTTGCCAAGTATAAAAACATACTTGTCTAGAATTTAAACGAGAAGACCCTGGAAACTTAT
AAACTGTACCCCTCCCGAACGCACGCTTCGAGTTTTAAATACGGTCCATTGATACAGAGT
TTTTCTGGGGCCGAAAAGATACGTATCTTACTGAATCTTATCTGACACACATAGGCAAGT
TACTCCAGGGAAAACAGCACAATGTTTTCTTAAAGCACTTATTTAAGAAAAAGTTTGTGA
CCTCGATGTTGAATCAATTTCACCTCTGGCCTGCACCCGGGCCACAGTGTCTGTCTGTTC
GACAAATCCGAAATTACGTGATTTGAGTTTAAACCGTCGCAAGACAGGTTGGATTCTCTT
CAGTTCCAGTGAACACAGAACCTAGACAGTACGAAAGGACCTCAGGTTCTCAACGCACCC
TCGCTACCTA
>drenale_mtDNA_05; 656-702; +; OH_1
TAAAAAAAAGATATATATGGATATATATATAGGGAACCTATTTATAT
>drenale_mtDNA_05; 823-855; +; OH_0-c
CTCCTCCTATATATCTATCAATATATATATATA
>drenale_mtDNA_05; 1469-1514; +; OH_0-a
CCCACACTCCCCCTAACCCCCCCCCCTTACCCCCCCCCCTTCCCCC
>drenale_mtDNA_05; 1809-1845; +; OH_0-b
TGTTTTCATCTATGTATTTTTTTTTGAATTTTTTTTT
>drenale_mtDNA_05; 2207-3310; +; cob
ATGATAAAAGTTGGCATACGGCAGTTGATGTGGTTCCCTACTCCTTTTAATTTAACTTAT
TCTTGGGGGTTGGGTAGGTTGTTGTTGTCTTTACTGGTGTGGCAAATTGCCACAGGGTTA
GGTTTGGTGTTTTATTATGTAGTAGGGGGTGACTCGCCCTTTGACAACTTGGTTGTCATT
ATGCGAGATATTAATCTTGGGTATGTTGTGCGATATGCACATGCGCTAGGGGCTTCGTTT
ATATTTATTGTGATATATGCGCATGTCATTAAAGCACTGTATTACTTCTCCTACGTTTTG
TATATTGTGTGGGTTCTGGGGGTGGTAATCCTTTTACTGGCTATGTTGGTATCTTTTGTG
GGTTATGTGTTACCCTGGGGTAACATGGGTCTCTGGGCTGCAACGGTAATCACCTCATTT
GTTTCAGCAGTTCCATTAATGGGCAGCCCTATCTTAGATTGAATTTGGGGCGGTTACTCT
GTAACCGAGCGGACACTTGGGTTTTTCTTCACTTTGCATTTCTTGCTTCCCCTAGTTATT
TTTCTATTAGCCCTTCTTCACCTATGGGCTCTTCATCTTACTGGGAGTACCGACGTACTC
GGTTATCATGGTGGTTATAATAAAATAAAGTTTGGTGGGCAGTACACCATTAAAGATTTT
GGGCTGGCTCTCATTCTGTTGCTGTTGGTTCTTTTCACCTGTCAAGCCCCCTACGTATTC
TCTGCCCCCGAGAACTTTTCTCCTGCCGATCATCTTTCCTCTCCTCTTTCCATCCAGCCC
GAGTGGTATTTTCTTCCACTTTACTCTCTTCTACGTAGCAGTACCACTAAGCTAGGAGGA
CTAGCATCAATAATGATAGGCGTCCTTGCTCTTCTTGCCCTACCTTCCCTAATTGTAAAA
CCCCTGTCGACAAGCTACACCTACCGTTCTCTAGTCACATTATATGTAATAATTGTTTTT
ATGCTCGGCTGAGTAGCTAGAGGCCCTGCTGACTCCTACTACTCAAGCTTCGGTTGGTGG
CTGATGTACTTTTACTACCTCTGGTTCGGGCTAATCTGAGCCCTGGTAACCAGCTCCTTC
ACCCTTCACACATCTTTATTATAA
>drenale_mtDNA_05; 3390-4522; +; rrnL
CCAATAATGAGCATAAAGTCCCCCCCTATGGACTTTGAAAAATTTTGATGAAGACGCAGT
CGCTAAATTTTAAGTTTAGTGGGGTGACTTCAAGTTGTGGTTATTGGAGTAACTAAAAAT
TTTTCCTTTTGTATCAGGAAGTTTTAAGAATTAAGTAATTTTACTTAAAAAGAAGAGTAG
AAAACTAAACTTTCTCGTCCCGTTCAGTAATATGGAACGAAGTTAGAGAAGTTTAGAGTA
TATATTACGCACTCTACTGGACATCTTTTAACAAAATCAGGTTTAGGTCAAGCTAAACCC
TTCTCTACCACCTCCTGGCACTCTCGGTTCCACCAGGCTTAGAATTTTCTAGCACAAGAA
ATTTAACAATTTTAACCTTACCCCTCTCCCAATCCCCCAGTGTTTCGAAGCACCTGCCCT
TCCTTTCAGAAACGAATTCAGTTTCTGTCAAAAATGAAACTCATGAGTACCCCTTCTCCT
CTCCCAAAGTTTTCACGAACCCCCACTTTAAAATTTTGTTTTTAAAACTCGGCCCTGATT
AGTCTAATGTTTACTAAAAACATTATGGGTTTCACTAGCTCACACTCCCTGCTCACTGAT
GAAAATTTAAATAGCCGCAGTATCCTGACTGTGCGAAGGTAGCGTAATCACTTGTGTTCT
AATTAAGCACCTGAATGAACGGGCAGACCAGGCTAATCTCTATTAAAAACAAACCCCGGG
AAATTACCACCAAGTATAAAAACATACTTGTCTAGAATTTAAACGAGAAGACCCTGGAAA
CTTATAAACTGTACCCCTCCCGAACGCACGCTTCGAGTTTTAAATACGGTCCATTGATAC
AGAGTTTTTCTGGGGCCGAAAAGATACGTATCTTACTGAATCTTATCTGACACACATAGG
CAAGTTACTCCAGGGAAAACAGCACAATGTTTTCTTAAAGCACTTATTTAAGAAAAAGTT
TGTGACCTCGATGTTGAATCAATTTCACCTCTGGCCTGCACCCGGGCCACAGTGTCTGTC
TGTTCGACAAATCCGAAATTACGTGATTTGAGTTTAAACCGTCGCAAGACAGGTTGGATT
CTCTTCAGTTCCAGTGAACACAGAACCTAGACAGTACGAAAGGACCTCAGGTT
>drenale_mtDNA_06; 11-64; -; trnG(tcc)
ATTAGTTCAGTATAAGTGTACCCTTAATTTCCAATTAAGAAGTTCTCGCTAATA
>drenale_mtDNA_06; 73-130; -; trnV(tac)
TGGAGTATAGTATAAATCACAGTACTGTACGTTTACACCGTACTAGCTCTTGCTCTAA
>drenale_mtDNA_06; 149-1060; -; nad1
ATATCCTGATGGATATTACTTAGCGTGGTGTATATTTTACTTGTGGTTGTCGGGTTGTTG
GTAGCAATTGCTTTTTTAACTTTGTTGGAGCGGGGGGTGTTGGGTTGCACTCAATGGCGT
CGAGGTCCAAATAAGGTTTGGGTTGTTGGGGTTTTGCAGCCTGTTCTTGATGGGGTTAAG
TTGTTAGCGAAGTCATCTGTGCGGTTGTTGCTACTGAATTGGGTGTTATACCTTACGGTA
CCTTTGATAAACATAACTCTATTGCTGTTCTTGTGGCCAATATTGCCTGCTATGTCTTAT
AGTTTAGATTTTAAATATGGGGTTTTGCTACTACTTTTAGTGTTAGGCTTGATAGGTTTT
ATGTTGATATTTAGAGGGTGAGCTGCGGGTTCGATATACTCCTATATTGGCGGGTTGCGT
TCATCAGCTCAGATGGTTTCTTATGAGGTGTGTTTGTCTTTTGTCTTTCTGGTGGTAATG
TTGATGTTGAGGTCATTTAGGCTGGTTTCGTTTTCAACGGAGGGTTATCTGTTGGTGAGT
TTGTGTTCGTTGCCATTTTGGGTGGTACTTTTAGTGCTGGTGCTAACTGAAACTAATCGT
GCTCCGTTTGACCTCTCTGAAGCAGAGAGGGAGTTAGTATCAGGGTTTAATGTTGAATAT
AGCTCTTCTGGGTTTGCTTTATTATTTTTGGGGGAGTACGGTTCGGTTCTTTTACTTAGG
GCCTTTGTGTCTATCTTGATGATTATGGCGTCATTTCCTGTATTGTCTCCAGTAATAGTG
TTGTTTGTGTTAGTGGCACGGTCTTCTTATCCTCGTATTCGATACGACAAGCTAATGTCC
CTAATGTGGTTTTCGTGTTTGCCGGGAGCTTTAGTATTGTGGTTTCCTTTTATAAATTTC
ACAGCTTTGTAA
>drenale_mtDNA_06; 1049-1118; -; trnK(ttt)
CATCTGGTAGCTTAAGTATAAAGCGTAAATTTTTTAAATTTATAATATATAATCTTCAAT
ATCCTGATGG
>drenale_mtDNA_06; 1776-1812; +; OH_0-b
AAAAAAAAATTCAAAAAAAAATACATAGATGAAAACA
>drenale_mtDNA_06; 2107-2152; +; OH_0-a
GGGGGAAGGGGGGGGGGTAAGGGGGGGGGGTTAGGGGGAGTGTGGG
>drenale_mtDNA_06; 2766-2798; +; OH_0-c
TATATATATATATTGATAGATATATAGGAGGAG
>drenale_mtDNA_06; 2919-2965; +; OH_1
ATATAAATAGGTTCCCTATATATATATCCATATATATCTTTTTTTTA
>drenale_mtDNA_07; 31-97; -; trnM(cat)
AATAGTATAAGCTAAATTTAAGCTACTGGGCCCATACCCCAATAACGTCTACAATAGACT
ACTATTA
>drenale_mtDNA_07; 96-153; -; trnF(gaa)
TTTCGCATAGCTTAAACTCAAAAAGCATAACTCTGAAGAAGTTAAGACTCCACGAAAA
>drenale_mtDNA_07; 159-226; -; trnI(gat)
GAAGCAGAACCAAATACTCATCTTGGAATACAGTGATACCGTATATTAGCATATAATAGC
CTGCTTTA
>drenale_mtDNA_07; 235-1089; -; nad2
ATTCTTAGACTGGGTGTTAGAAGCAGTACTTGATTAGGTGTGTGGCTAGCCATAGAAAGA
AGAAGCTGAGTCATGATTGCCTTATTGTGCACCGGGTATTTGAAAAGAGGCAGGTTATTC
AAGCTGTACTACCTATCATCCATTAGCAGCCTTAGACTAGTAGTTGTATGACTAAGAGGG
TTCACATGATCGTGCGACTTTATCCCAGCAATTTTAATATTTAAAATAGGCATACCCCCC
TTTCACTGGTGGGTGAAATGGATCCTGGAAGAGTTAAGATGAAAAAAGATATGGTTAATG
CTCAATCTGCATAAAGTGTTGCCTTTAATCCTGGCGTGCACTAAAATCAGAAACAAACTA
TTCCTGGGGTGAGCGATAAGCGCTATATGGTGAAGATTCTGATATTTTTGAACAAGAAGA
AGATGATTTTTTATTATTTTCTACTCATCGATGTTCCACACAAGGTGGGCCGCCCTCAGA
ATCTTAGACATAAGAAAATTATTAGTGTACTGGACTGGGTACAGACTTATCATATGAAGA
CTACTTGTGCTATTGGACTCCATAGTAGAAAAAGAAATTCTAATCGGCATTTTATTTTTA
TTAATATTAAGAACCCCACCCTCTCTTTTATTTTTCACTAAATGAAACATTATTAGCTAC
CTGATAACCCCCATATTTTTACTAATACTTACCACCCTAGTAATCAGATTTACCCCAATA
TACGCATACACCCGCATAATTTGAATCAGCACAACTAACAACCCAACCTCTCTACCAAAC
ACCCCCGAACCAATAAAGCAAAACGAAACACTCACGCTCTTATGCGTAACAAGCGGAGGG
CTGTTGTTACTATAA
>drenale_mtDNA_07; 2269-2315; +; OH_1
TAAAAAAAAGATATATATGGATATATATATAGGGAACCTATTTATAT
>drenale_mtDNA_07; 2436-2468; +; OH_0-c
CTCCTCCTATATATCTATCAATATATATATATA
>drenale_mtDNA_07; 3082-3127; +; OH_0-a
CCCACACTCCCCCTAACCCCCCCCCCTTACCCCCCCCCCTTCCCCC
>drenale_mtDNA_07; 3422-3458; +; OH_0-b
TGTTTTCATCTATGTATTTTTTTTTGAATTTTTTTTT
>drenale_mtDNA_08; 266-333; +; trnL1(tag)
GCTGTCTTGGCAGAAGTAGAATGCGGTAAATTTAGGATTTTCTAATACCTGGTGTCAGGT
AGCCAGCA
>drenale_mtDNA_08; 333-385; +; trnS2(tga)
AGGTTAGGTTTTAAAGTTTGAAACTTTATTTATCGACTAAGTCGACTAATCTT
>drenale_mtDNA_08; 386-737; +; nad3
ATTTTGGGATTTTCGTTGGTTATGTTTTTATTAATGAGGCTAGTCAGGTTATTGTTACTA
CTGATTCAAACTCTTCTTCGAGAAGAGGAAGACTGGTTACAGTCTGGGTTTGAATGCGGG
GTAGAGTTTTTAAAGACTGGCCGCCTCCCTTTTTCTTTAAATTTTTATTCGGTTGCGTTG
ATTTTTGTGGTGTTTGATTTGGAAATTTTATTGGTAGTTGGGGTTATAACATGGGTAGGC
AGGGTGGAATTTTATTTCAACTGTCAACTGTTACTTGTGTTTGTTTTTGTGGGATTGCTA
TTGGAGTGAAGGCTTAGTAAACTTGTGTGATATCTTTGCTTTGTTAGTTTAT
>drenale_mtDNA_08; 723-791; +; trnT(tgt)
GCTTTGTTAGTTTATTGGAAAGTTTAAAACGTAGATTTTGTAAATCTAAAAAATTGGAAA
AGCACAGCT
>drenale_mtDNA_08; 785-846; -; trnW(tca)
ACAGCTTTAAGTTAAATAAACTACGAGCCTTCAAAGTTCAAAATGCTTTTGTGCAAGCTG
TG
>drenale_mtDNA_08; 844-904; +; trnN(gtt)
TGTGAAGCTTAGCATATGCGTAAATGCGGTGGAATGTTAATCCATTGAATTGTCTTCATT
A
>drenale_mtDNA_08; 920-1171; -; nad4l
ATAAGTGAGATTTTAATTTTCAGTGTTAGCCTAATTAAAATAATTTTAAGAAATGGAAGA
GTAATAAGCATCGTTGTGAGTCTGGAGTTAAGCAGCTTAAGAGTGATTAGGTTAAGATGA
TGCTACCAGAGATGAGAAAGAACGGTGTGAAGAGTGATAATTAGGGTTACCCACAGAGTG
GTAGGACTTACATTAATAGTATTACTGGTGCGCAGTTTCAGTAATGACAAAAGAAGAAAC
ATATTAATTTAG
>drenale_mtDNA_08; 1239-1297; +; trnD(gtc)
GGAGCTTTAGTTTATAAAAAAACATTAGCATGTCAGGCTAAAGTGTGAATGGCTCTCCT
>drenale_mtDNA_08; 2305-2351; +; OH_1
TAAAAAAAAGATATATATGGATATATATATAGGGAACCTATTTATAT
>drenale_mtDNA_08; 2472-2504; +; OH_0-c
CTCCTCCTATATATCTATCAATATATATATATA
>drenale_mtDNA_08; 3118-3163; +; OH_0-a
CCCACACTCCCCCTAACCCCCCCCCCTTACCCCCCCCCCTTCCCCC
>drenale_mtDNA_08; 3458-3494; +; OH_0-b
TGTTTTCATCTATGTATTTTTTTTTGAATTTTTTTTT
>drenale_mtDNA_09; 22-82; -; trnR(tcg)
CAACGTTAAATGATAAATCATACTTAATTTCGACTTAAGCTTAGGAAATTTCCAACGTTG
A
>drenale_mtDNA_09; 45-1304; -; nad4
ATGATAAAACTCAGATTCAAAGTGCTGCTGCTACTAAGCATTATAAGAACCATATGCTTA
CTAGACGCAGGCAGTAGATGGAGATTTAACATCGACAGGAGAAGAAGTATAAGCCGCTGT
ATAAATTTAATTACGTTTTTGGTAATAATTATTATTTTTAGGACCGCAATATCCAATCGA
ATTAAATTTAGCGCTTATGTATTAAGGTATGTGCCAATCTTATTACTACTTTTTAACAGA
GATAATGTCATCTTGTTCTACCTAATATTTGAACTATCCATCTTACCCATTTTTATCATC
ATCATCAGGTGAGGAGGGCAACCTGAGCGGATAAGAAGAGGGTCATATCTTATGCTTTAT
ACTTTGAGCTTATCAGTCCCGTTATTTGTACTGCTACTGAACCTAAATAATTTTAGCTGT
CAAAACAGCTGACCATCAAACCGCAATCTTTCATTTATTATGATAACCATAATCACCATA
CCCTTTTTAATTAAGATGCCACTATTTAGTGTCCATATATGACTACCCAAAGCGCATGTG
GAAAGACCAACAGTAGGAAGTATGATCCTGGCCGGGGCGCTACTAAAAACAGGAGGGTAT
GGGCTATATAAAATAAGCCTGTTCACTAGAAGAAGGCTAGCGTGTCTAATAAGAAGAGTA
GGAATCCTGTTAGTAAGAAGATCAATTCTAACAGGGGTGATACAAAGCGACATTAAAAAA
TTCGTAGCTTTTAGCAGTGTTTCACACATAAGCATAATCGCATGTATAGTGACAAGTAAA
AGAATTAACACTAATCTAATCATAAGTTTAATCATACTATCGCACAGAGTGCTAAGCAGA
CTTATGTTTTACTTTATGGCATCCTTAACAAACAGAGCAAAATCCCGAATAACTTATATT
CAAGCATCCCTACAATCATCAACGAGCAAATGTTGGTTGCTGACAACCATAATATTTTTC
AACATCGGAATCCCTCCCGCTATCTCTCTCGCAGGAGAGATAAGAACATTCACTACCCTA
AATAGCATATGAAAATGAAACATCCCACTATGTATAATTATATTTTTCACATTTATAGTT
ATGGCCTCTTGAATTATCATTACCCTGGTAAGCGCTAAACACAACTTAATCACACCCACT
TCCCCAAGAAGTGAAGACATCTCCATTAGCTCCTCCCTAACCCTATCCGTCGCCCTGTGA
GAAATTACAGAATTATTAACATCAACGTTAAATGATAAATCATACTTAATTTCGACTTAA
>drenale_mtDNA_09; 2347-2393; +; OH_1
TAAAAAAAAGATATATATGGATATATATATAGGGAACCTATTTATAT
>drenale_mtDNA_09; 2514-2546; +; OH_0-c
CTCCTCCTATATATCTATCAATATATATATATA
>drenale_mtDNA_09; 3160-3197; +; OH_0-a
CCCACACTCCCCCTAACCCCCCCCCCTTACCCCCCCCC
>drenale_mtDNA_09; 3499-3535; +; OH_0-b
TGTTTTCATCTATGTATTTTTTTTTGAATTTTTTTTT
>drenale_mtDNA_10; 24-1643; -; nad5
ATGGAGAGGTGAGGAGAGCCGTGGGGCTTTAGAAAACGAGATTCCGCAGATTTCACAAGT
CTGAGAAAACTTCTAATCACGTTATTCTGTTACTATCTCTATAGGGTAAGGCTTTTATTA
GTTATCAGCCTAAGAGCAATTTGTTGTTGCAGAGGCAGGTTTACAACTATTAACTGAAAC
CTGTACGGTAGGACTTTGGACTTAAGCTGAGGCAGGAGGGAGGCGTTCTGAATTATTGTA
ACAATTTTGAGAATTTGTATTTTCATCTTTAGCGGGTACTACATAGCTTCTAATAAAGGA
AGCGGAAGTTTCACTATTACTTTAATCGCATTTGTATTCAGCATGCTTATTTTAATAAGC
GCAGATAGCTACTGAGTAGCCTGGGTAGGTTGAGAAGGACTAGGAGTCAGGAGGTTTCTC
CTGATCTCATTTTACAACAACTGAAAAAGTAACAACGCCGCAAATGTAACTATTCTTATG
AACCGCGCAGGGGACTTCCTGTTGATAAGATGCCTGGTAGTCGTTTTACTAAAAAATAAC
TATGAGCTTAAAAGGATATTGGAAAATTGGGTATTTTTAGTTTTAGCAGGGGGAGCGGCC
TTAACCAAGGGTGCACAAATCCCCATAAGAAGCTGGCTGCCGTTAGCTATGGCCGCTCCT
ACCCCGGTCAGATCTCTAGTTCACTCGTCTACACTTGTAGTGGCAGGTATCGTCCTCATA
AATTATACGATAAGACTGTGTGAAAACAGAACGCTGCTGTGTCTAATAAGAAGAGTAGGA
GTGGTAACAATGATTTATAGAGGCGTAAGTGCACTTTGTGAGCAAGACTTTAAAAAGATC
TTAGCATTTTCCACAATAAGCCAAATAGGACTGGGATATTTCATAATTAGCAACAATCTA
ACCTGCTTGATAATATTCCACATCTCCACCCACGCAGTAGCAAAAGCTACTCTATTTATA
TGCGCAGGCAGATTGATTCACCTAATATTTAATAATCAAGACTCGCGTTTCACCTCAGCA
GGAGGATATAGATGGGTCACGCTATGAGCAGTGACAGGGACAAGGGCAGCAACTCTTGCT
GGAGCAAGCATGACAGCCTGCCACATATCCAAAGAATGAGGAATGACTTGATGGCTTAAC
AGAAACTCTAGTATTATTTTACTTACAGTAGTAATCATTCCTACTGTGATGTACTCCATA
CGAGTATTCTCAACATTTTTAAACCCACTAAATGAACACGGAGCCGATAAAGAGAAATTA
CAAGCCTGAGAAAGAGGTTTTTCAATTAGGTTGAGAATCTTCTTAGTAATAATTTTAGGC
TACTGGTACGCCACCAATTTCACAATACCCGCCAAACTTACAGAGCCTAATATAAAACTG
ATTGCTCTAATTACGCCCGCAATAAGAATAATTTGATGAAACAAAATCACACCTGCTTTT
AATAACAATGAGTCCGCCTACAAAAACTTAATTCTAACCCCAACAATCTATACAACCCAA
AACATTCAAAACATAACTTTAACCTACAATAGGTTACTCCCCCACACATTAACACAAAAA
TTCTTAGATCCAATAATAGCTACACTTACCGTCCTACTACTATTATGAATTTTTTTCTAA
>drenale_mtDNA_10; 2640-2686; +; OH_1
TAAAAAAAAGATATATATGGATATATATATAGGGAACCTATTTATAT
>drenale_mtDNA_10; 2807-2839; +; OH_0-c
CTCCTCCTATATATCTATCAATATATATATATA
>drenale_mtDNA_10; 3453-3490; +; OH_0-a
CCCACACTCCCCCTAACCCCCCCCCCTTACCCCCCCCC
>drenale_mtDNA_10; 3792-3828; +; OH_0-b
TGTTTTCATCTATGTATTTTTTTTTGAATTTTTTTTT
>drenale_mtDNA_11; 4-666; -; rrnS
TAAAAATTTCGTTAAGGTCTTCAGCTGCATCTAGTAAAAGGTGTGCCAGCTACTGCGGTT
ATACACCTAGCCTCCGGTCTAAATCTGTTTCATTAAGCACAACTCCAAAATTCATAAGTA
CTCTCACATCTTAACAGCTTGTAAAGTGAAATTAGGAAGCTGTTTAAATTTTACTCACTC
TGCTCTAATGGAAATCTGGGGCTCAGACCGGGATTAGATACCCCGCTATGCCAAACTTAA
CAGGTAAAGTACTAAACTAACTCTTAAACTTAATTAAGATGGCGGTTCGGAACTACAACG
GAGAAAGTTGTCTAGTAACTGATACTCCTCACTCCTCCACCTGAGTTAATTTCTTGTATA
TCGCCGTTGATTTGCTGTTTTAGACAGCCTATCTGAAAGTTTCATTCTGCGTCACCAGGT
CCACATACAGTTTACGCTCAGGGTTTTGATGACTTGCGTATAGCTTCTCAGCTTACCTGC
TCACCTTCCAGTAAGTGAAACGTAGGATTCGTAAGTAATCCTCACTACCAGCATCTTAAT
TGATACTTTTCCATACCAGGATGAAATGTAACTTTCTGAATGCACATATCGCCCGTCACC
CTCCACTTTACTGGAGGAAAGTCGTAACAAAGTAGAGGTTTTGGAAAAAGCCTCTAGTCC
ACC
>drenale_mtDNA_11; 744-796; -; trnS1(tct)
GAAGAGGTTAAGGTTAAGCTTCTAACTTAACTTCTGACACTGTCACCTCTTCA
>drenale_mtDNA_11; 792-813; +; OL
TCTTCCCGTGAAAGAAGGAAGA
>drenale_mtDNA_11; 814-1266; -; nad6
ATATTGTTCGTTGTTGGTTTAATGTCATTACTGGTTTGTTTATTTTTGGTGGTGTCACAT
CCTATGTGGATGTCTCTGGAGGTGTTTTTTATCAGTGTGTGTTTGGCAGTGTTAAAGTTT
AGTCTGTCCTCTGATGGCCATTTGCTGTGTTATTTGTTTTTAATAGTTTACAGGGGTGGG
CTGTTAATACTATTTATATATGTTTCATCTGTTAGCCCTCGTTACTCTATAGGTGTGCTG
GTTGGTTTGCTGTTCACTCCAGTAGTTTACTTGCTGTTGACCTCTAGGGTGGTTAGTTGA
CCTCAGTTTTCACTAATGGACGTTTCTACACCTTCTTTAATTTTAATTCAGCTCCCGACG
GTTCTACCTCTAGTTGGAGTGTTGTTGTTAGCGCTTCTGTTGTTGTCCTACTTGCTGTCG
GAGGTCCAGTACCCTTTGCGTACGTTAATTTAA
>drenale_mtDNA_11; 1268-1323; +; trnP(tgg)
CAGATTTTAGTTTATTTAAAAACATAGAACCTGGACTTCTAAAAATTCAAATCTGA
>drenale_mtDNA_11; 1326-1385; -; trnE(ttc)
GGCCTAGTGGTGAAAATTTTTAATCACGGTGAAATTTCAGTTCACAGTTTTGTTGGGTTG
>drenale_mtDNA_11; 2030-2066; +; OH_0-b
AAAAAAAAATTCAAAAAAAAATACATAGATGAAAACA
>drenale_mtDNA_11; 2361-2406; +; OH_0-a
GGGGGAAGGGGGGGGGGTAAGGGGGGGGGGTTAGGGGGAGTGTGGG
>drenale_mtDNA_11; 3020-3052; +; OH_0-c
TATATATATATATTGATAGATATATAGGAGGAG
>drenale_mtDNA_11; 3173-3219; +; OH_1
ATATAAATAGGTTCCCTATATATATATCCATATATATCTTTTTTTTA

## Sheet: smt_PCG_AA
D. renale amino acid sequences of mitochondrial genes in fasta format
>drenale_mtDNA_01; 1010-1750; -; atp6
MMKWLLWLLAGSVIGVTLFSGTGDLSYLKYRDLGVTLGAMDVGYGVWVQVLSSVVVTALL
IFVFLGRMMSVSRGSLWKVGVGFGSNMGYSVVMTVVTAVVLFNLVSMFAYSWMPATQWYF
LFIMTFVYLLAMFLYVLLASGLKMFGVNVYLGWLLLHFILWGFHSVSFFVRFVSLPFRMM
MNLMIGLFLLELAESSGVSVLLISLYEVFVISVQTLVFVLLVNMYYSESVVSDTWHVEHP
QQVSLL*
>drenale_mtDNA_02; 139-1681; -; cox1
MMKWLFTGNHKKIGVMYILFGVWAGFVGLGLSVIIRYVLASPWSMGWSPFISQYYNAIIS
AHGIIMIFYMMMPIMMGGMGNIMVPVMLGLPDMAFPRLNNLGFWLLPPSFLLFVSSMMFS
VSGPGTGWTLYPPLSLFTGHPDVCVDFVIFSLHLAGVSSLLSSVNFVTTCFSVCDSVSSL
EDMPMFAWSIVVTSFMLIVSLPVLAGGITMLLTDRNFNTAFFETSGGGDPVLFQHIFWFF
GHPEVYILALPAFGVISESVTVLSGKPKVFGPLGMIYAMISIGVLGCFVWVHHMFTVGLD
VDTRAYFAAASMIIGIPTGVKVFSWLATLYGGQVIFSPLYCWTVGFISVFLLGGLTGISL
ANASLDVHLHDTYYVVGHFHFVLSLGVVFAIMVALNLWAPYIFGAQLDKFLQLTQFMVMF
PGSFLTFLPHHFMGLNGMPRRYVDYSDSYSVMHLTSSLGSLLSAISVVMLSLTLWVLLTS
PRNLISFTPSTSSPTALLTSPLTAHSFTQPHTNGX
>drenale_mtDNA_03; 3099-3782; +; cox2
MMEWVRFFLQDPASNDSLGVYEFMSWLMAVLALIVVFSLVLIVSVLLNSGVGFVLGLVES
KLLEFLWTLLPVLIVVLISGFSLQQIYALDSEEEPPVLTVKVIAHQWYWSYSYPDFSVEF
DSYMNSGISLMERLVDCDNRVVLPVLTPSRFIITSMDVIHSWAVPSFSVKVDAVPGRVSS
VVLESKVPALAVGQCSELCGVNHSFMPITLEFTSPLLFKCWLTSTLN*
>drenale_mtDNA_04; 104-877; -; cox3
MIKFSYSFSTPWVSTSLVATLLCMVVLLSLFWTSCGFGVLLVSGVVLLVLSVLLWQRDQQ
REGLVSIPSLSADDYDFKMGFLLFLLGEAFFFLSFFWVYVSSVLVPDYMMWPPKGILVPD
STSLPLLNTVLLVTSSLTLTLSHESINSPSPGTTGFVWLFLTLVLGLMFLSFQGWEYFNL
PFSLTSGLYGSVFYGATGFHGLHVFLGSLFLFYCAVRLVFNHYDSVFQLSYTLSVWYWHF
VDAIWLLLFMMIYCWGC*
>drenale_mtDNA_05; 2207-3310; +; cob
MMKVGMRQLMWFPTPFNLTYSWGLGSLLLSLLVWQIATGLGLVFYYVVGGDSPFDNLVVI
MRDINLGYVVRYAHALGASFMFIVMYAHVIKALYYFSYVLYIVWVLGVVILLLAMLVSFV
GYVLPWGNMGLWAATVITSFVSAVPLMGSPILDWIWGGYSVTERTLGFFFTLHFLLPLVI
FLLALLHLWALHLTGSTDVLGYHGGYNKMKFGGQYTIKDFGLALILLLLVLFTCQAPYVF
SAPENFSPADHLSSPLSIQPEWYFLPLYSLLRSSTTKLGGLASMMMGVLALLALPSLIVK
PLSTSYTYRSLVTLYVMIVFMLGWVASGPADSYYSSFGWWLMYFYYLWFGLIWALVTSSF
TLHTSLL*
>drenale_mtDNA_06; 149-1060; -; nad1
MSWWMLLSVVYILLVVVGLLVAIAFLTLLERGVLGCTQWRRGPNKVWVVGVLQPVLDGVK
LLAKSSVRLLLLNWVLYLTVPLMNMTLLLFLWPMLPAMSYSLDFKYGVLLLLLVLGLMGF
MLMFSGWAAGSMYSYIGGLRSSAQMVSYEVCLSFVFLVVMLMLSSFSLVSFSTEGYLLVS
LCSLPFWVVLLVLVLTETNRAPFDLSEAESELVSGFNVEYSSSGFALLFLGEYGSVLLLS
AFVSILMIMASFPVLSPVMVLFVLVARSSYPRIRYDKLMSLMWFSCLPGALVLWFPFMNF
TAL*
>drenale_mtDNA_07; 235-1089; -; nad2
ILSLGVSSSTWLGVWLAMESSSWVMIALLCTGYLKSGSLFKLYYLSSISSLSLVVVWLSG
FTWSCDFIPAILMFKMGMPPFHWWVKWILEELSWKKMWLMLNLHKVLPLILACTKISNKL
FLGWAMSAMWWSFWYFWTSSSWFFIIFYSSMFHTSWAALSILDMSKLLVYWTGYSLIMWS
LLVLLDSMVEKEILIGILFLLMLSTPPSLLFFTKWNIISYLMTPMFLLMLTTLVISFTPM
YAYTRMIWISTTNNPTSLPNTPEPMKQNETLTLLCVTSGGLLLL*
>drenale_mtDNA_08; 386-737; +; nad3
ILGFSLVMFLLMSLVSLLLLLIQTLLREEEDWLQSGFECGVEFLKTGRLPFSLNFYSVAL
IFVVFDLEILLVVGVMTWVGSVEFYFNCQLLLVFVFVGLLLEWSLSKLVWYLCFVSLX
>drenale_mtDNA_08_nad4l; 920-1171; -; nad4l
MSEILIFSVSLIKMILSNGSVMSIVVSLELSSLSVISLSWCYQSWESTVWSVMISVTHSV
VGLTLMVLLVRSFSNDKSSNMLI*
>drenale_mtDNA_09; 45-1304; -; nad4
MMKLSFKVLLLLSIMSTMCLLDAGSSWSFNIDSSSSMSRCMNLITFLVMIIIFSTAMSNR
IKFSAYVLSYVPILLLLFNSDNVILFYLMFELSILPIFIIIISWGGQPERMSSGSYLMLY
TLSLSVPLFVLLLNLNNFSCQNSWPSNRNLSFIMMTMITMPFLIKMPLFSVHMWLPKAHV
ESPTVGSMILAGALLKTGGYGLYKMSLFTSSSLACLMSSVGILLVSSSILTGVMQSDIKK
FVAFSSVSHMSMIACMVTSKSINTNLIMSLIMLSHSVLSSLMFYFMASLTNSAKSRMTYI
QASLQSSTSKCWLLTTMMFFNIGIPPAISLAGEMSTFTTLNSMWKWNIPLCMIMFFTFMV
MASWIIITLVSAKHNLITPTSPSSEDISISSSLTLSVALWEITELLTSTLNDKSYLIST*
>drenale_mtDNA_10; 24-1643; -; nad5
MESWGEPWGFSKRDSADFTSLSKLLITLFCYYLYSVSLLLVISLSAICCCSGSFTTINWN
LYGSTLDLSWGSSEAFWIIVTILSICIFIFSGYYMASNKGSGSFTITLIAFVFSMLILMS
ADSYWVAWVGWEGLGVSSFLLISFYNNWKSNNAANVTILMNRAGDFLLMSCLVVVLLKNN
YELKSMLENWVFLVLAGGAALTKGAQIPMSSWLPLAMAAPTPVSSLVHSSTLVVAGIVLM
NYTMSLCENSTLLCLMSSVGVVTMIYSGVSALCEQDFKKILAFSTMSQMGLGYFMISNNL
TCLMMFHISTHAVAKATLFMCAGSLIHLMFNNQDSRFTSAGGYSWVTLWAVTGTSAATLA
GASMTACHMSKEWGMTWWLNSNSSIILLTVVIIPTVMYSMRVFSTFLNPLNEHGADKEKL
QAWESGFSISLSIFLVMILGYWYATNFTMPAKLTEPNMKLIALITPAMSMIWWNKITPAF
NNNESAYKNLILTPTIYTTQNIQNMTLTYNSLLPHTLTQKFLDPMMATLTVLLLLWIFF*
>drenale_mtDNA_11; 814-1266; -; nad6
MLFVVGLMSLLVCLFLVVSHPMWMSLEVFFISVCLAVLKFSLSSDGHLLCYLFLMVYSGG
LLMLFMYVSSVSPRYSMGVLVGLLFTPVVYLLLTSSVVSWPQFSLMDVSTPSLILIQLPT
VLPLVGVLLLALLLLSYLLSEVQYPLRTLI*

## Sheet: NCR_sequences
D. renale mitochondrial non coding sequences in fasta format
>drenale_NCR1_mtDNA_01:1751-4328(+):1-150(+)
ACCACACCCACCAATAACTGAAGTCACCCCACTAAACTTAAAATTTAGCGACTGCGTCTTCATCAAAATTTTTCAAAGTCCATAGGGGGGGACTTTATGCTCATTATTGGAAAACGTTCGGAGGTAGATTTGAGCGAGTAAAACCCTTGTTTTCGCTCAAATTACGTGTCCAGCCCCGATAAATACTTTAAAAGTGGTATGGAGAGCTCTCGAGCAGCAGGAACCGCTAGCACTCTAGCTCACCAGTAAAGAAGGGAAGAAGGGGGCCGCGTGTTAAAAAATCTCATCATACCCCCCCCCCAACACATATACAAATTCTCTCTTTATTGGACACCCCCCCACACTTATACAAAAAACACACTTGCCATACCCCCCCTCTCTAAAACCACCACATAAAAA…
>drenale_NCR2_mtDNA_02:1682-3341(+):1-137(+)
ACCACACCCACCAATAACTGAAGTCACCCCACTAAACTTAAAATTTAGCGACTGCGTCTTCATCAAAATTTTTCAAAGTCCATAGGGGGGGACTTTATGCTCATTATTGGAAAACGTTCGGAGGTAGATTTGAGCGAGTAAAACCCTTGTTTTCGCTCAAATTACGTGTCCAGCCCCGATAAATACTTTAAAAGTGGTATGGAGAGCTCTCGAGCAGCAGGAACCGCTAGCACTCTAGCTCACCAGTAAAGAAGGGAAGAAGGGGGCCGCGTGTTAAAAAATCTCATCATACCCCCCCCCCAACACATATACAAATTCTCTCTTTATTGGACACCCCCCCACGCTTACATGAAAAAACACACTTGCCATACCCCCCCCCTCTCTAAAACCACCACATAA…
>drenale_NCR3_mtDNA_03:16-2881(-)
ACCCGCCAACAACCACAATAATCATTTTATCATAACCACACCCACCAATAACTGAAGTCACCCCACTAAACTTAAAATTTAGCGACTGCGTCTTCATCAAAATTTTTCAAAGTCCATAGGGGGGGACTTTATGCTCATTATTGGAAAACGTTCGGAGGTAGATTTGAGCGAGTAAAACCCTTGTTTTCGCTCAAATTACGTGTCCAGCCCCGATAAATACTTTAAAAGTGGTATGGAGAGCTCTCGAGCAGCAGGAACCGCTAGCACTCTAGCTCACCAGTAAAGGTGGGAAGAAGGGGGCCGCGTGTTAAAAAATCTCATCATACCCCCCCCCCAACACATATACAAATTCTCTCTTTATTGGACACCCCCCCACACTTACATGAAAAAACACACTTG…
>drenale_NCR4_mtDNA_04:940-3669(+)
AAATTTTTAGTTACTCCAATAACCACAACTTGAAGTCACCCCACTAAACTTAAAATTTAGCGACTGCGTCTTCATCAAAATTTTTCAAAGTCCATAGGGGGGGACTTTATGCTCATTATTGGAAAACGTTCGGAGGTAGATTTGAGCGAGTAAAACCCTTGTTTTCGCTCAAATTACGTGTCCAGCCCCGATAAATACTTTAAAAGTGGTATGGAGAGCTCTCGAGCAGCAGGAACCGCTAGCACTCTAGCTCACCAGTAAAGGTGGGAAGAAGGGGGCCGCGTGTTAAAAAATCTCATCATACCCCCCCCCCAACACATATACAAATTCTCTCTTTATTGGACACCCCCCCACACTTATACAAAAAACACACTTGCCATACCCCCCCTCTCTAAAACC…
>drenale_NCR5_mtDNA_05:1-2205(-)
CCCCCCCCCAACACATATACAAATTCTCTCTTTATTGGACACCCCCCCACACTTATACAAAAAACACACTTGCCATACCCCCCCTCTCTAAAACCACCACATAAAAATACCAGCAGATCTGCCCTTCGCCCGCTCAAATAGCGTTTGGGGCAGAGTTGAAAAACATGAATTCGCCGGGCCAGCTTGGGGGCGGCGCGGCTTCATTAAGAGATGACGTCGCCCTCGTACCCTCTCACTCGGGCTCCGTGATAATAAAGAAAAACATAAAAAATCAAACCTCACAAAGCCACGAGTTCCTGCCGCCCACCCCTCGGGCAACACGCATAAAAAATTTCCATAAGTTGCGCGGGTGCGCGATGCAAAAAAAAATTCAAAAAAAAATACATAGATGAAAACACT…
>drenale_NCR6_mtDNA_06:1119-3972(+)
CATACTCCAATAACCACAACTTGAAGTCACCCCACTAAACTTAAAATTTAGCGACTGCGTCTTCATCAAAATTTTTCAAAGTCCATAGGGGGGGACTTTATGCTCATTATTGGAAAACGTTCGGAGGTAGATTTGAGCGAGTAAAACCCTTGTTTTCGCTCAAATTACGTGTCCAGCCCCGATAAATACTTTAAAAGTGGTATGGAGAGCTCTCGAGCAGCAGGAACCGCTAGCACTCTAGCTCACCAGTAAAGAAGGGAAGAAGGGGGCCGCGTGTTAAAAAATCTCATCATACCCCCCCCCAACACATATACAAATTCTCTCTTTATTGGACACCCCCCCACACTTACACGAAAAAACACACTTGCCATACCCCCCCCTCTCTAAAACCACCACATA…
>drenale_NCR7_mtDNA_07:1090-4031(-)
CATAGGGGGGGACTTTATGCTCATTATTGGAAAACGTTCGGAGGTAGATTTGAGCGAGTAAAACCCTTGTTTTCGCTCAAATTACGTGTCCAGCCCCGATAAATACTTTAAAAGTGGTATGGAGAGCTCTCGAGCAGCAGGAACCGCTAGCACTCTAGCTCACCAGTAAAGGTGGGAAGAAGGGGGCCGCGTGTTAAAAAATCTCATCATACCCCCCCCCCAACACATATACAAATTCTCTCTTTATTGGACACCCCCCCACGCTTAAACAAAAAACACACTTGCCATACCCCCCTCTCTCTAAAACCACCACATAAAAATACCAGCAGATCTGCCCTTCGCCCGCTCAAATAGCGTTTGGGGCAGAGTTGAAAAACATGAATTCGCCGGGCCAGCTTG…
>drenale_NCR8_mtDNA_08:1298-4127(-):1-264(-)
GAAGTCACCCCACTAAACTTAAAATTTAGCGACTGCGTCTTCATCAAAATTTTTCAAAGTCCATAGGGGGGGACTTTATGCTCATTATTGGAAAACGTTCGGAGGTAGATTTGAGCGAGTAAAACCCTTGTTTTCGCTCAAATTACGTGTCCAGCCCCGATAAATACTTTAAAAGTGGTATGGAGAGCTCTCGAGCAGCAGGAACCGCTAGCACTCTAGCTCACCAGTAAAGGTGGGAAGAAGGGGGCCGCGTGTTAAAAAATCTCATCATACCCCCCCCCCAACACATATACAAATTCTCTCTTTATTGGACACCCCCCCACGCTTAAACAAAAAACACACTTGCCATACCCCCCCTCTCTAAAACCACCACATAAAAATACCAGCAGATCTGCCCTT…
>drenale_NCR9_mtDNA_09:1305-4108(-)
CATAGGGGGGGACTTTATGCTCATTATTGGAAAACGTTCGGAGGTAGATTTGAGCGAGTAAAACCCTTGTTTTCGCTCAAATTACGTGTCCAGCCCCGATAAATACTTTAAAAGTGGTATGGAGAGCTCTCGAGCAGCAGGAACCGCTAGCACTCTAGCTCACCAGTAAAGGTGGGAAGAAGGGGGCCGCGTGTTAAAAAATCTCATCATACCCCCCCCCCAACACATATACAAATTCTCTCTTTATTGGACACCCCCCCACACTTACACGAAAAAACACACTTGCCATACCCCCCCTCTCTAAAACCACCACATAAAAATACCAGCAGATCTGCCCTTCGCCCGCTCAAATAGCGTTTGGGGCAGAGTTGAAAAACATGAATTCGCCGGGCCAGCTTG…
>drenale_NCR10_mtDNA_10:1644-4403(-)
CATAGGGGGGGACTTTATGCTCATTATTGGAAAACGTTCGGAGGTAGATTTGAGCGAGTAAAACCCTTGTTTTCGCTCAAATTACGTGTCCAGCCCCGATAAATACTTTAAAAGTGGTATGGAGAGCTCTCGAGCAGCAGGAACCGCTAGCACTCTAGCTCACCAGTAAAGGTGGGAAGAAGGGGGCCGCGTGTTAAAAAATCTCATCATACCCCCCCCCCCAACACATATACAAATTCTCTCTTTATTGGACACCCCCCCCACACTTACATGAAAAAACACACTTGCCATACCCCCCCTCTCTAAAACCACCACATAAAAATACCAGCAGATCTGCCCTTCGCCCGCTCAAATAGCGTTTGGGGCAGAGTTGAAAAACATGAATTCGCCGGGCCAGCT…
>drenale_NCR11_mtDNA_11:1386-3630(+)
ACCAATAACTGAAGTCACCCCACTAAACTTAAAATTTAGCGACTGCGTCTTCATCAAAATTTTTCAAAGTCCATAGGGGGGGACTTTATGCTCATTATTGGAAAACGTTCGGAGGTAGATTTGAGCGAGTAAAACCCTTGTTTTCGCTCAAATTACGTGTCCAGCCCCGATAAATACTTTAAAAGTGGTATGGAGAGCTCTCGAGCAGCAGGAACCGCTAGCACTCTAGCTCACCAGTAAAGGTGGGAAGAAGGGGGCCGCGTGTTAAAAAATCTCATCATACCCCCCCCCCAACACATATACAAATTCTCTCTTTATTGGACACCCCCCCACACTTATACAAAAAACACACTTGCCATACCCCCCCCTCTCTAAAACCACCACATAAAAATACCAGCA…
